# Supplementary material for: A Series of Novel 3D Coordination Polymers Based on the Quinoline-2,4-dicarboxylate Building Block and Lanthanide(III) Ions—Temperature Dependence Investigations
Source: MDPI journal article supplement (doi:10.3390/molecules28176360), 2023-08-30
Supplement: s1 [file s1]

Supplementary Materials

# A Series of Novel 3D Coordination Polymers Based on the Quinoline-2,4-dicarboxylate Building Block and Lanthanide(III) Ions—Temperature Dependence Investigations

Dmytro Vlasyuk <sup>1,\*</sup>, Renata Łyszczek <sup>1,\*</sup>, Liliana Mazur <sup>1</sup>, Agnieszka Pladzyk <sup>2</sup>, Zbigniew Hnatejko <sup>3</sup> and Przemysław Woźny <sup>3</sup>

<sup>1</sup> Department of General and Coordination Chemistry and Crystallography, Faculty of Chemistry, Institute of Chemical Sciences, Maria Curie-Skłodowska University, M. C. Skłodowskiej Sq. 2, 20-031 Lublin, Poland; liliana.mazur@mail.umcs.pl

<sup>2</sup> Department of Inorganic Chemistry, Faculty of Chemistry, Gdańsk University of Technology, Narutowicza 11/12, 80-233 Gdańsk, Poland

<sup>3</sup> Department of Rare Earths, Faculty of Chemistry, Adam Mickiewicz University in Poznań, Uniwersytetu Poznańskiego 8, 61-614 Poznań, Poland; zbigniew.hnatejko@amu.edu.pl (Z.H.); przemyslaw.wozny@amu.edu.pl (P.W.)

\* Correspondence: dmytro.vlasyuk@mail.umcs.pl (D.V.), renata.lyszczek@mail.umcs.pl (R.Ł.)

## Neodymium(III) complexes

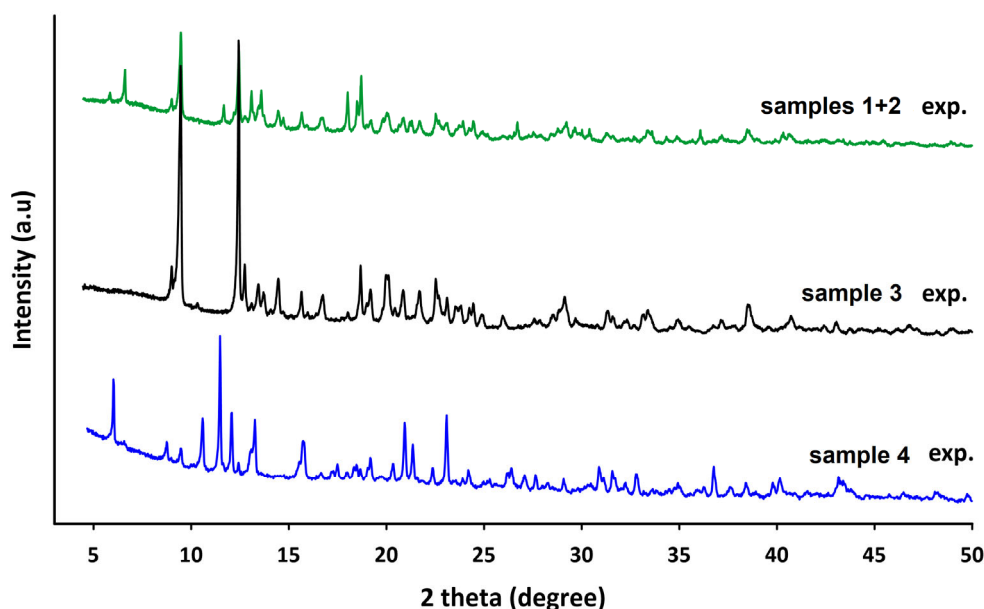

**Figure S1.** X-ray diffraction patterns of neodymium(III) samples obtained at different temperature (100, 120 and 150 °C).

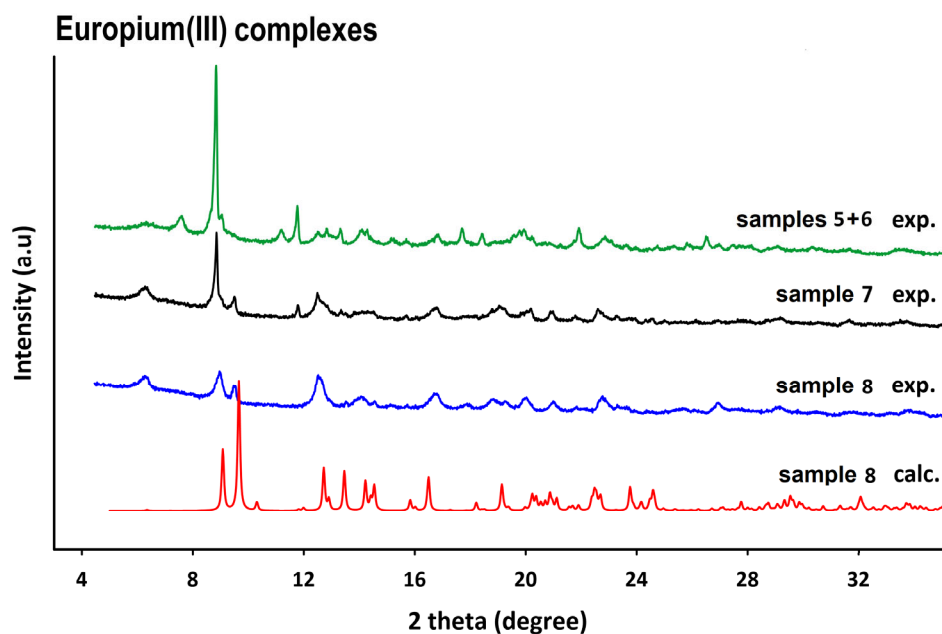

**Figure S2.** X-ray diffraction patterns of europium(III) samples obtained at different temperature (100, 120 and 150 °C).

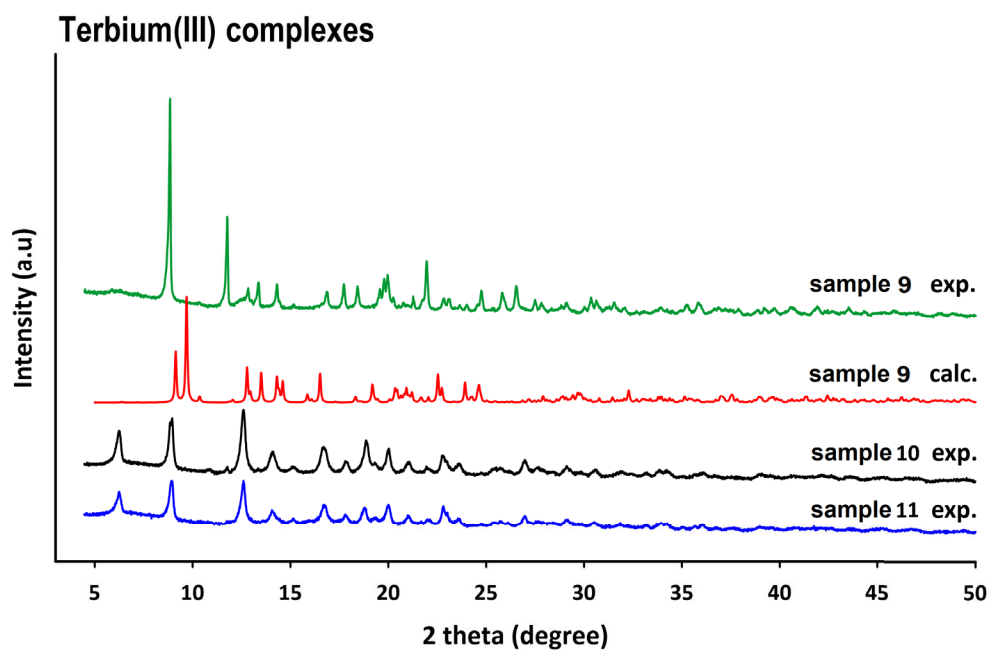

**Figure S3.** X-ray diffraction patterns of terbium(III) samples obtained at different temperature (100, 120 and 150 °C).

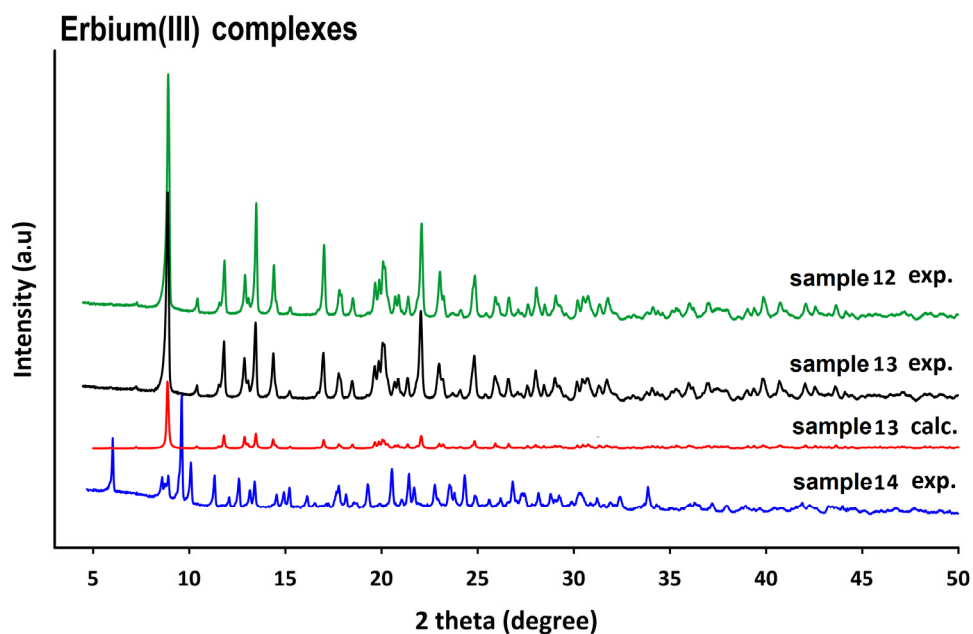

**Figure S4.** X-ray diffraction patterns of erbium(III) samples obtained at different temperature (100, 120 and 150 °C).

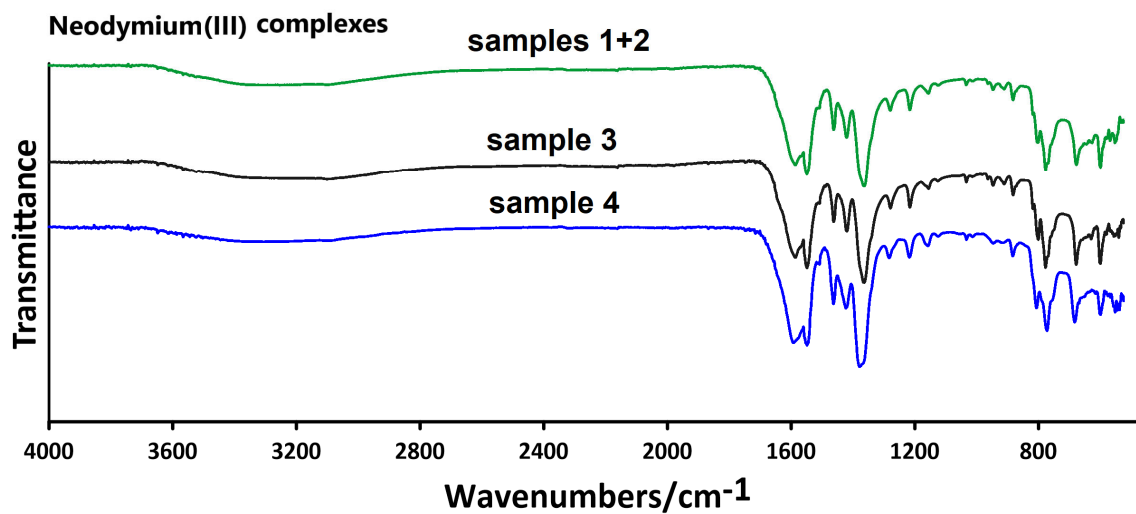

**Figure S5.** ATR/FTIR spectrum of neodymium(III) samples obtained at different temperature (100, 120 and 150 °C).

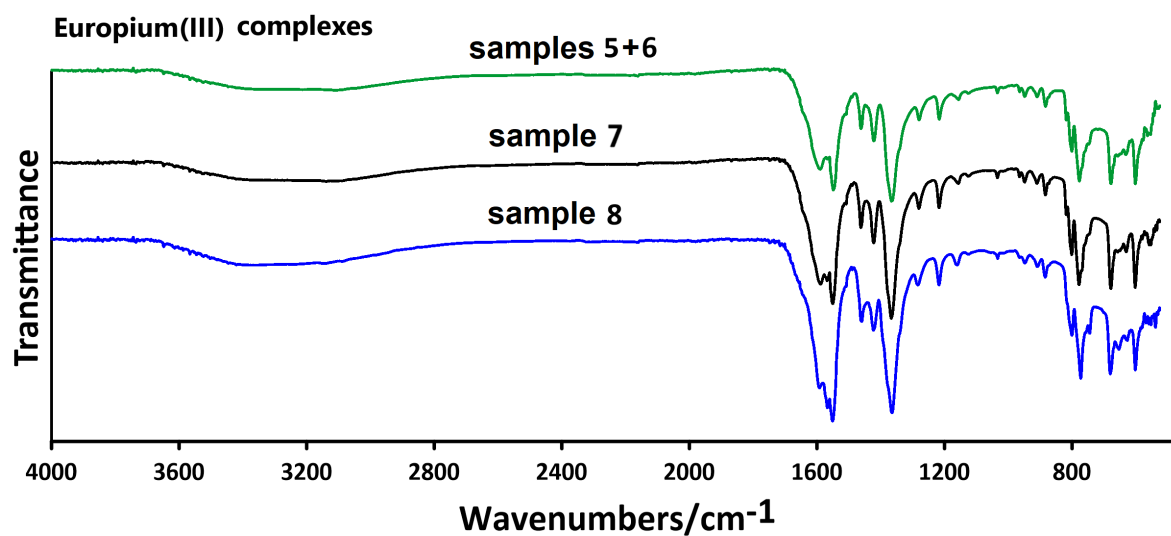

**Figure S6.** ATR/FTIR spectrum of europium(III) samples obtained at different temperature (100, 120 and 150 °C).

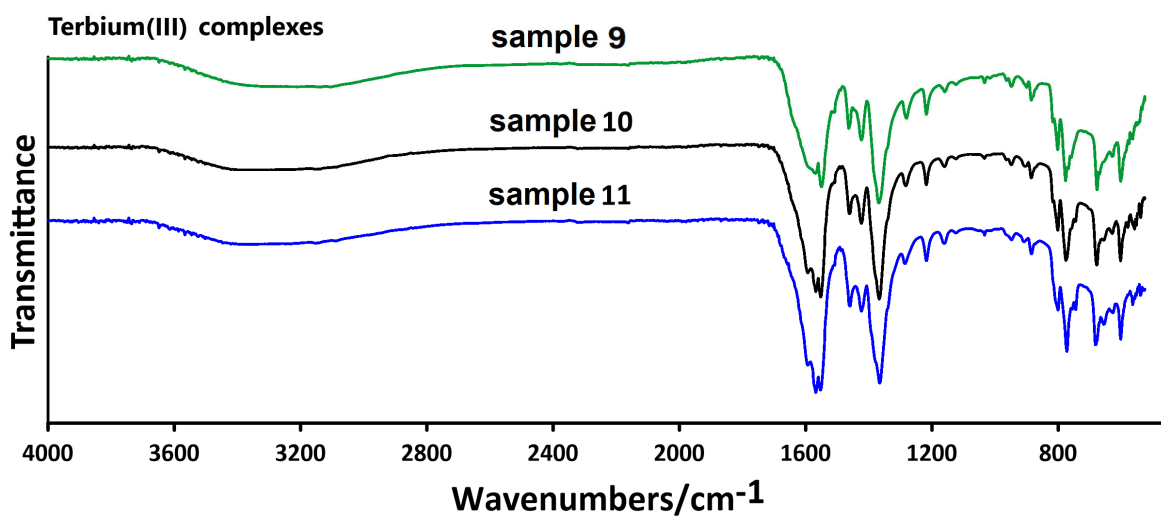

**Figure S7.** ATR/FTIR spectrum of terbium(III) samples obtained at different temperature (100, 120 and 150 °C).

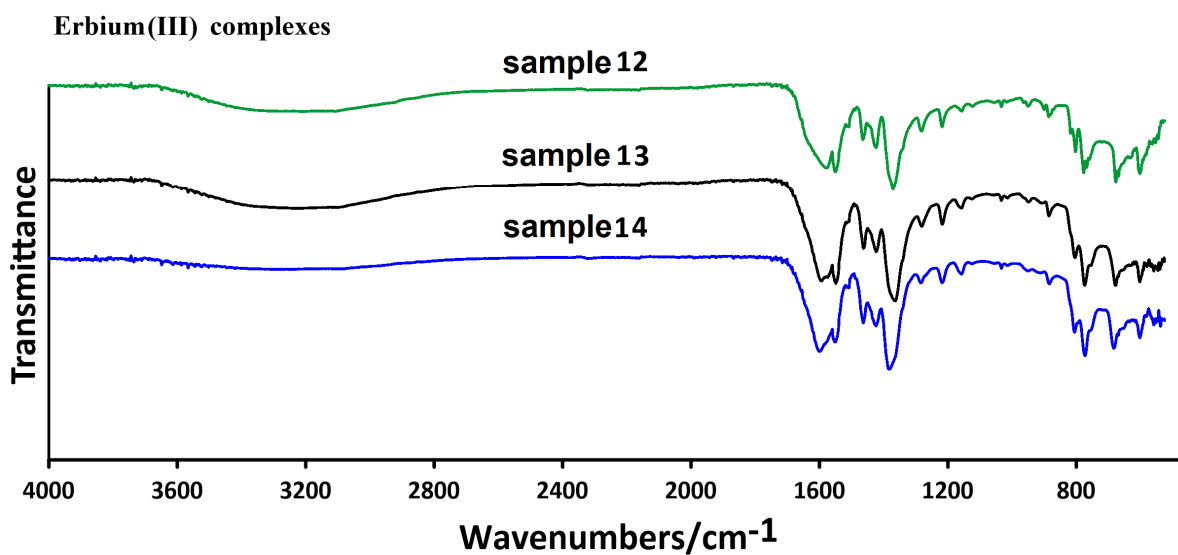

**Figure S8.** ATR/FTIR spectrum of erbium (III) samples obtained at different temperature (100, 120 and 150 °C).

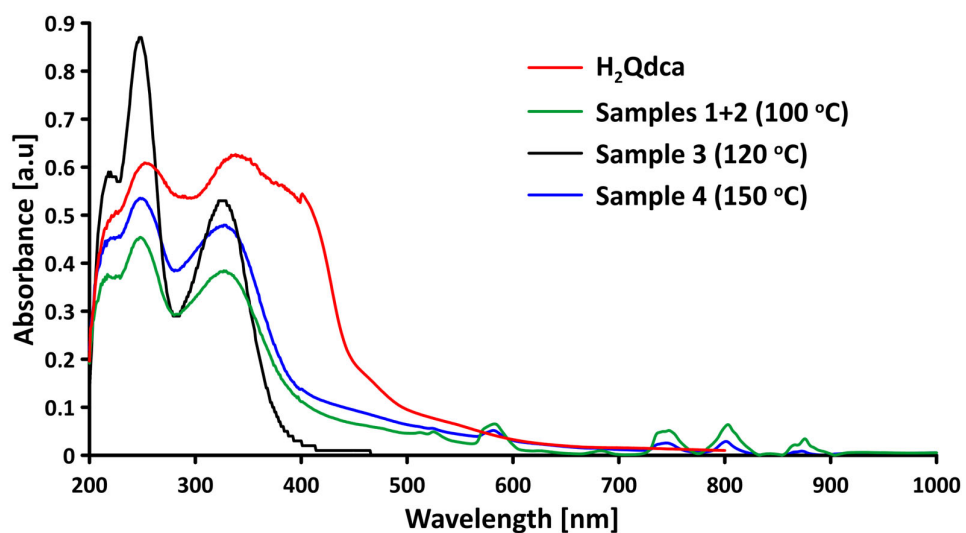

**Figure S9.** UV-VIS spectra of the neodymium(III) samples obtained at different temperature (100, 120 and 150 °C).

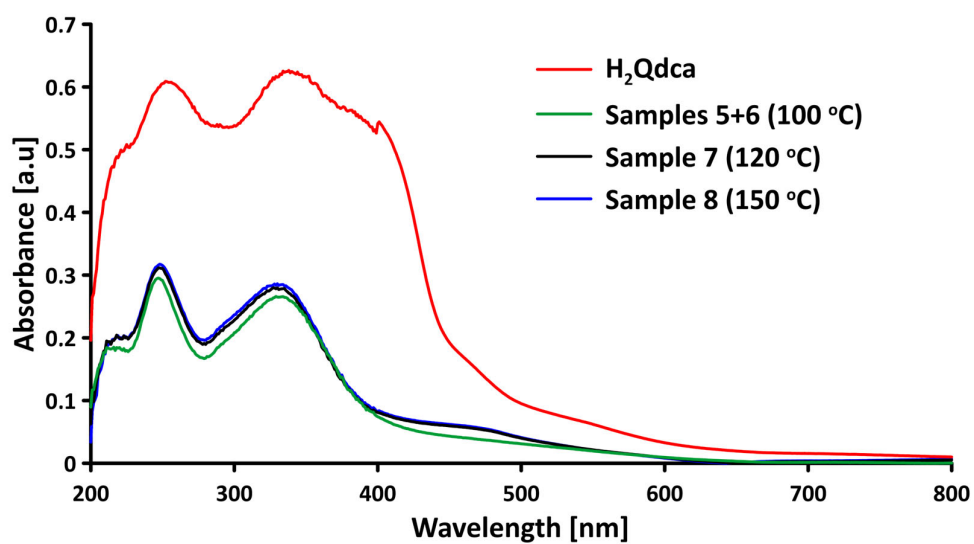

Figure S10. UV-VIS spectra of the europium(III) samples obtained at different temperature (100, 120 and 150 °C).

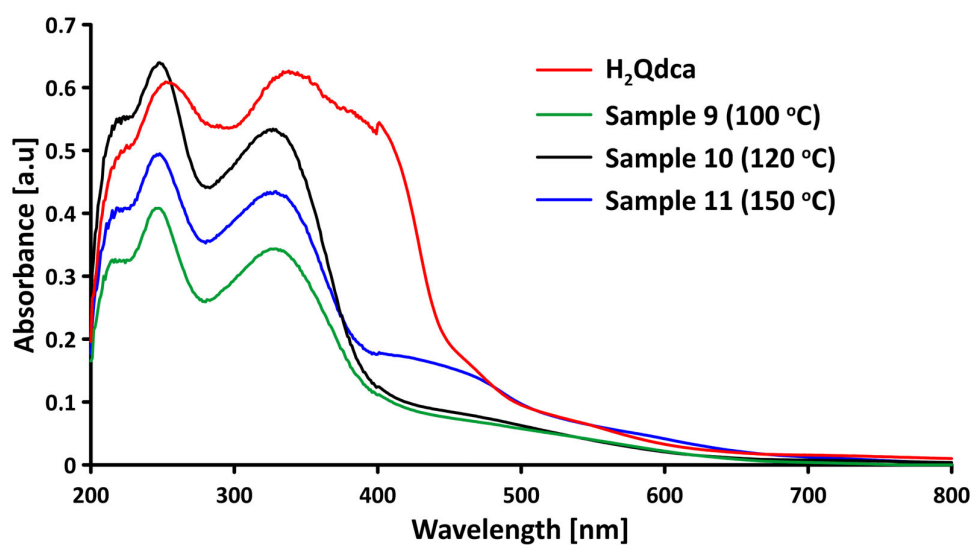

Figure S11. UV-VIS spectra of the terbium (III) samples obtained at different temperature (100, 120 and 150 °C).

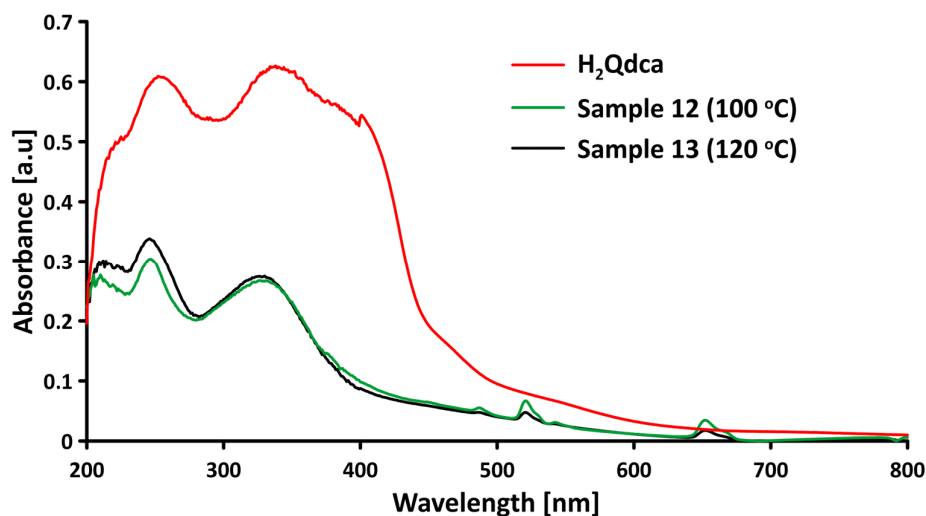

Figure S12. UV-VIS spectra of the erbium (III) samples obtained at different temperature (100 and 120 °C).

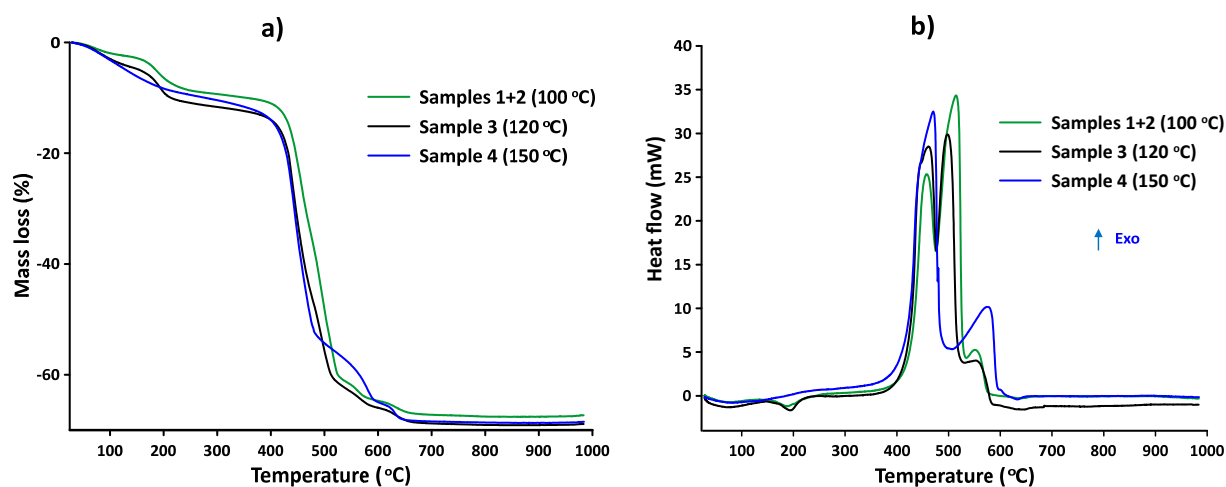

Figure S13. a) TG and b) DSC curves of neodymium (III) complexes in air atmosphere, obtained at different temperature (100, 120 and 150 °C).

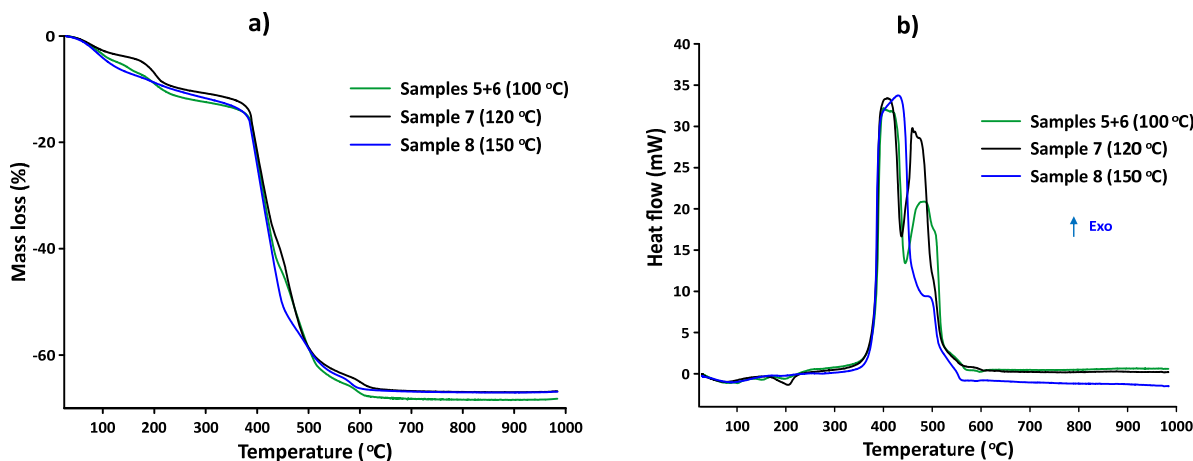

Figure S14. a) TG and b) DSC curves of europium (III) complexes in air atmosphere, obtained at different temperature (100, 120 and 150 °C).

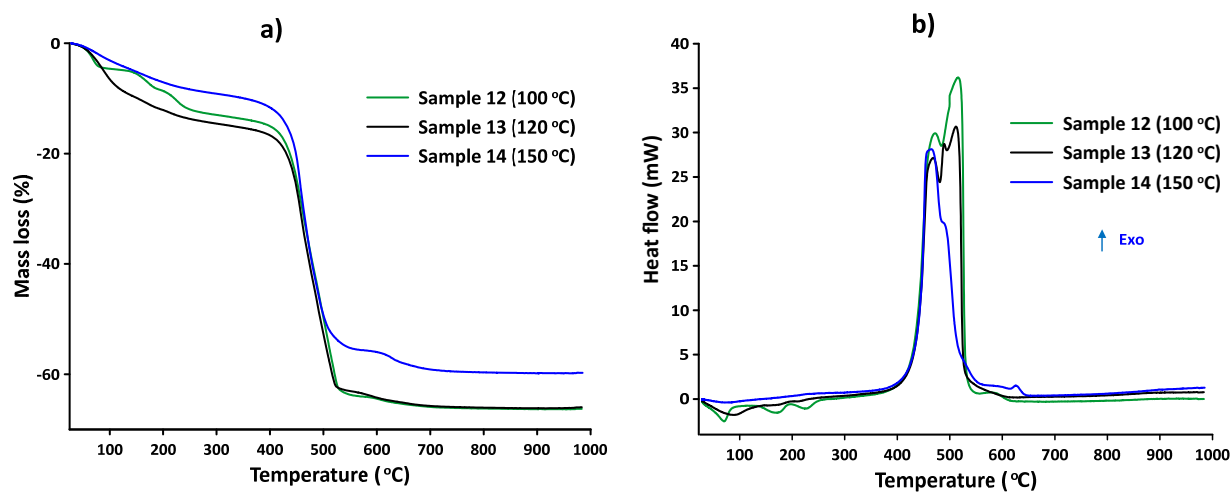

**Figure S15.** a) TG and b) DSC curves of erbium (III) complexes in air atmosphere, obtained at different temperature (100, 120 and 150 °C).

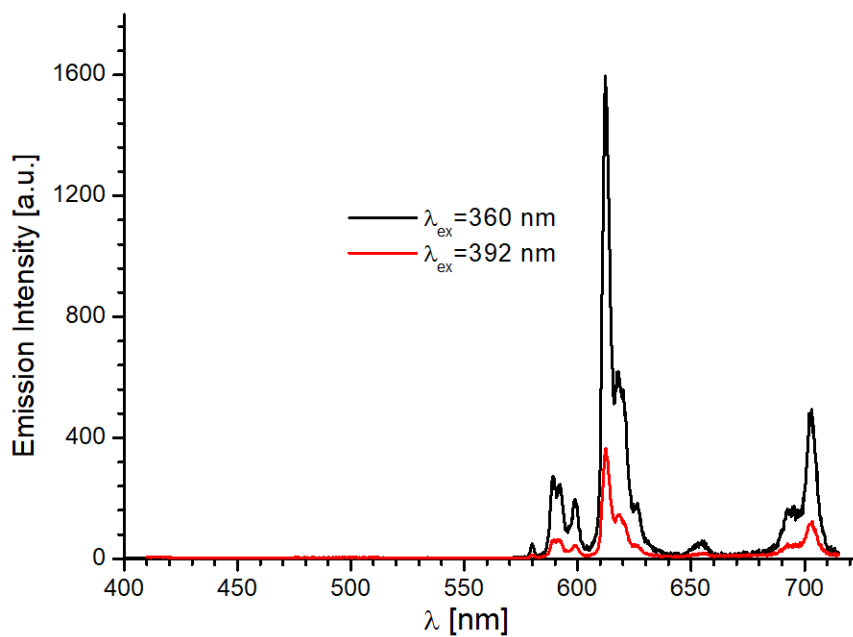

**Figure S16.** Room temperature emission spectra of  $[\text{Eu}_2\text{Qdca}_3(\text{H}_2\text{O})_4] \cdot \text{H}_2\text{O}$  in solid state ( $\lambda_{\text{ex}} = 360$  and 392 nm).



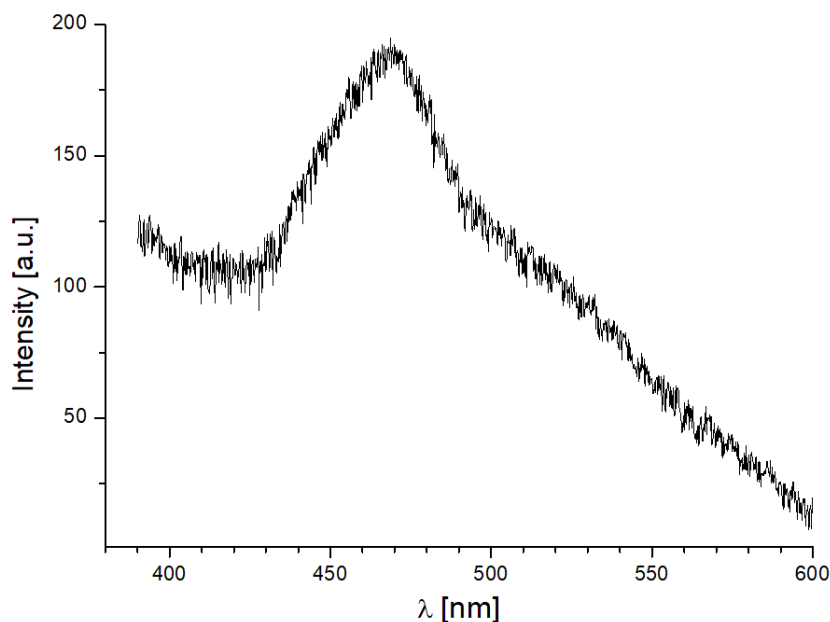

**Figure S17.** Low temperature phosphorescence spectrum of  $[\text{Gd}_2(\text{Qdca})_3(\text{H}_2\text{O})_4] \cdot \text{H}_2\text{O}$  in ethanol solution at 148 °C ( $\lambda_{\text{ex}}=360$  nm).

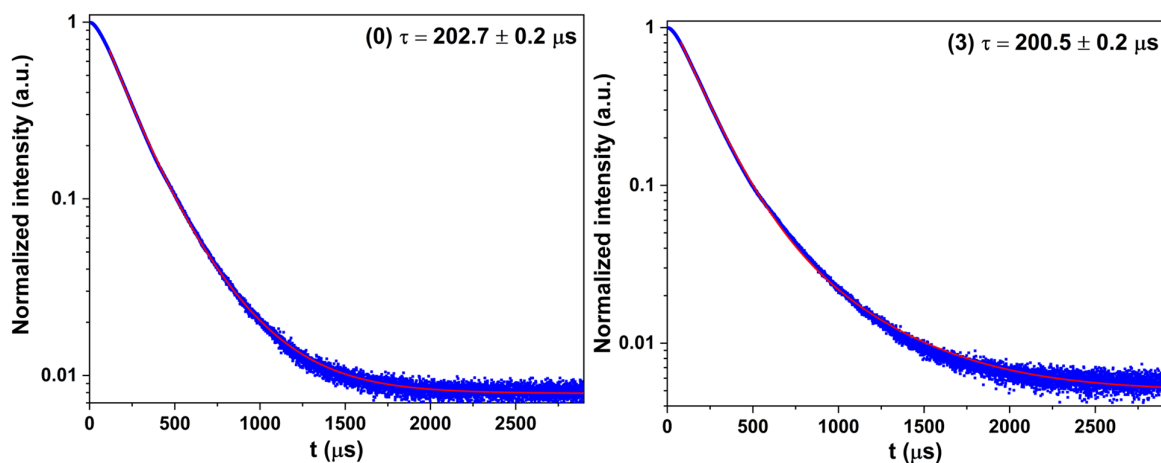

**Figure S18.** Typical luminescence decay profiles observed for Eu(III) complexes in the solid state at room temperature prepared in 100 °C and 150 °C (blue points are the raw data while the red line is a monoexponential fit).

**Table S1.** Results of the elemental analysis of prepared complexes.

| Name of Complex     | Temperature of Synthesis | Number of Compounds | C (%)                                        |       | H (%)                                      |      | N (%)                                      |      |
|---------------------|--------------------------|---------------------|----------------------------------------------|-------|--------------------------------------------|------|--------------------------------------------|------|
|                     |                          |                     | Cal.                                         | Exp.  | Cal.                                       | Exp. | Cal.                                       | Exp. |
| Neodymium complexes | 100 °C                   | 1+2                 | 40.10 <sup>(1)</sup><br>38.69 <sup>(2)</sup> | 35.76 | 2.12 <sup>(1)</sup><br>2.44 <sup>(2)</sup> | 3.08 | 4.25 <sup>(1)</sup><br>4.10 <sup>(2)</sup> | 3.84 |
|                     | 120 °C                   | 3                   | 38.69                                        | 36.84 | 2.44                                       | 2.42 | 4.10                                       | 3.85 |
|                     | 150 °C                   | 4                   | 37.37                                        | 37.22 | 2.74                                       | 2.40 | 3.96                                       | 3.87 |
| Europium complexes  | 100 °C                   | 5+6                 | 36.83 <sup>(5)</sup><br>38.11 <sup>(6)</sup> | 34.69 | 2.69 <sup>(5)</sup><br>2.41 <sup>(6)</sup> | 2.94 | 3.91 <sup>(5)</sup><br>3.91 <sup>(6)</sup> | 3.83 |
|                     | 120 °C                   | 7                   | 38.11                                        | 34.11 | 2.41                                       | 2.92 | 3.91                                       | 3.93 |
|                     | 150 °C                   | 8                   | 38.11                                        | 34.55 | 2.41                                       | 2.67 | 3.91                                       | 3.88 |
| Terbium complexes   | 100 °C                   | 9                   | 37.61                                        | 35.77 | 2.37                                       | 2.96 | 3.99                                       | 3.92 |
|                     | 120 °C                   | 10                  | 36.36                                        | 34.61 | 2.66                                       | 2.95 | 3.86                                       | 4.06 |

|                  |        |    |       |       |      |      |      |      |
|------------------|--------|----|-------|-------|------|------|------|------|
| Erbium complexes | 150 °C | 11 | 36.36 | 34.25 | 2.66 | 2.76 | 3.86 | 4.07 |
|                  | 100 °C | 12 | 35.24 | 33.95 | 2.76 | 2.82 | 3.74 | 3.74 |
|                  | 120 °C | 13 | 35.24 | 33.63 | 2.76 | 2.85 | 3.74 | 3.84 |
|                  | 150 °C | 14 | 32.15 | 28.74 | 3.49 | 2.38 | 3.41 | 3.74 |

Table S2. Bond Lengths for (1)[Nd<sub>2</sub>(Qdca)<sub>3</sub>(H<sub>2</sub>O)<sub>3</sub>].

| Atom | Atom | Length/Å  | Atom | Atom             | Length/Å  |
|------|------|-----------|------|------------------|-----------|
| C2A  | C3A  | 1.417(7)  | C9B  | C10B             | 1.420(8)  |
| C2A  | C11A | 1.507(8)  | C9C  | C10C             | 1.425(9)  |
| C2A  | N1A  | 1.320(7)  | C10A | N1A              | 1.374(7)  |
| C2B  | C3B  | 1.415(8)  | C10B | N1B              | 1.350(8)  |
| C2B  | C11B | 1.530(8)  | C10C | N1C              | 1.374(8)  |
| C2B  | N1B  | 1.315(8)  | C11A | O1A              | 1.269(7)  |
| C2C  | C3C  | 1.398(8)  | C11A | O2A              | 1.240(7)  |
| C2C  | C11C | 1.509(8)  | C11B | O1B              | 1.254(8)  |
| C2C  | N1C  | 1.331(7)  | C11B | O2B              | 1.270(8)  |
| C3A  | C4A  | 1.361(8)  | C11C | O1C              | 1.251(7)  |
| C3B  | C4B  | 1.365(9)  | C11C | O2C              | 1.250(8)  |
| C3C  | C4C  | 1.353(9)  | C12A | O3A              | 1.256(10) |
| C4A  | C5A  | 1.412(7)  | C12A | O4A              | 1.239(10) |
| C4A  | C12A | 1.517(7)  | C12B | O3B              | 1.251(11) |
| C4B  | C5B  | 1.422(8)  | C12B | O4B              | 1.243(11) |
| C4B  | C12B | 1.524(8)  | C12C | O3C              | 1.250(7)  |
| C4C  | C5C  | 1.421(9)  | C12C | O4C              | 1.255(7)  |
| C4C  | C12C | 1.519(7)  | C12C | Nd1              | 2.883(5)  |
| C5A  | C6A  | 1.427(8)  | N1A  | Nd1              | 2.664(4)  |
| C5A  | C10A | 1.412(8)  | N1C  | Nd2 <sup>1</sup> | 2.888(4)  |
| C5B  | C6B  | 1.411(8)  | O1A  | Nd1              | 2.414(5)  |
| C5B  | C10B | 1.427(8)  | O1B  | Nd2 <sup>2</sup> | 2.581(5)  |
| C5C  | C6C  | 1.432(9)  | O1C  | Nd2 <sup>1</sup> | 2.358(4)  |
| C5C  | C10C | 1.428(8)  | O2A  | Nd2 <sup>2</sup> | 2.476(4)  |
| C6A  | C7A  | 1.355(9)  | O1W  | Nd1              | 2.449(6)  |
| C6B  | C7B  | 1.378(9)  | O2B  | Nd1              | 2.409(5)  |
| C6C  | C7C  | 1.353(10) | O2W  | Nd2              | 2.433(5)  |
| C7A  | C8A  | 1.404(9)  | O3A  | Nd1 <sup>3</sup> | 2.464(5)  |
| C7B  | C8B  | 1.414(10) | O3B  | Nd2              | 2.355(5)  |
| C7C  | C8C  | 1.411(10) | O3C  | Nd1              | 2.534(4)  |
| C8A  | C9A  | 1.359(8)  | O3W  | Nd2              | 2.438(5)  |
| C8B  | C9B  | 1.357(9)  | O4A  | Nd1 <sup>4</sup> | 2.425(6)  |
| C8C  | C9C  | 1.353(10) | O4B  | Nd2 <sup>5</sup> | 2.469(5)  |
| C9A  | C10A | 1.420(7)  | O4C  | Nd1              | 2.502(4)  |

Symmetry code: <sup>1</sup>1/2+x,3/2-y,+z; <sup>2</sup>-1/2+x,3/2-y,+z; <sup>3</sup>1-x,1-y,-1/2+z; <sup>4</sup>1-x,1-y,1/2+z; <sup>5</sup>+x,+y,-1+z.Table S3. Bond Lengths for (4) [Nd<sub>2</sub>(Qdca)<sub>3</sub>(H<sub>2</sub>O)<sub>4</sub>].3H<sub>2</sub>O.

| Atom | Atom             | Length/Å | Atom | Atom | Length/Å |
|------|------------------|----------|------|------|----------|
| Nd1  | O1A <sup>1</sup> | 2.368(4) | C5B  | C4B  | 1.415(9) |
| Nd1  | O4A              | 2.360(5) | C5B  | C6B  | 1.427(9) |
| Nd1  | O2A <sup>2</sup> | 2.508(5) | C10B | C9B  | 1.432(9) |
| Nd1  | O2B <sup>3</sup> | 2.381(4) | C4B  | C3B  | 1.375(9) |
| Nd1  | O4B              | 2.368(5) | C4B  | C12B | 1.504(8) |
| Nd1  | N1A <sup>1</sup> | 2.780(5) | C10A | C5A  | 1.421(9) |
| Nd1  | O1W              | 2.501(6) | C10A | C9A  | 1.413(9) |
| Nd1  | O4W              | 2.571(7) | C3B  | C2B  | 1.411(9) |
| Nd2  | O3B              | 2.354(4) | C4A  | C5A  | 1.429(9) |

|     |                  |          |      |      |           |
|-----|------------------|----------|------|------|-----------|
| Nd2 | O1B <sup>4</sup> | 2.402(4) | C4A  | C3A  | 1.367(9)  |
| Nd2 | O1C <sup>5</sup> | 2.400(5) | C4A  | C12A | 1.525(9)  |
| Nd2 | O4C              | 2.302(5) | C5A  | C6A  | 1.414(9)  |
| Nd2 | O3W              | 2.484(6) | C2B  | C11B | 1.496(9)  |
| Nd2 | N1B <sup>4</sup> | 2.724(5) | C5C  | C6C  | 1.433(10) |
| Nd2 | N1C <sup>5</sup> | 2.727(5) | C5C  | C10C | 1.412(9)  |
| Nd2 | O2W              | 2.518(6) | C5C  | C4C  | 1.409(9)  |
| O1A | C11A             | 1.270(8) | C3A  | C2A  | 1.399(9)  |
| O3B | C12B             | 1.255(8) | O3C  | C12C | 1.212(9)  |
| O4A | C12A             | 1.245(8) | C2A  | C11A | 1.503(9)  |
| O2A | C11A             | 1.255(8) | C9B  | C8B  | 1.359(10) |
| O1B | C11B             | 1.261(8) | C6B  | C7B  | 1.352(10) |
| O2B | C11B             | 1.248(8) | C6C  | C7C  | 1.342(10) |
| O4B | C12B             | 1.236(8) | C9A  | C8A  | 1.353(11) |
| O1C | C11C             | 1.267(8) | C10C | C9C  | 1.407(9)  |
| O4C | C12C             | 1.257(8) | C2C  | C3C  | 1.403(9)  |
| N1A | C10A             | 1.377(8) | C2C  | C11C | 1.505(10) |
| N1A | C2A              | 1.325(8) | C4C  | C3C  | 1.371(10) |
| N1B | C10B             | 1.355(8) | C4C  | C12C | 1.524(9)  |
| N1B | C2B              | 1.335(8) | C9C  | C8C  | 1.351(11) |
| O3A | C12A             | 1.240(9) | C6A  | C7A  | 1.372(11) |
| O2C | C11C             | 1.251(8) | C7A  | C8A  | 1.400(11) |
| N1C | C10C             | 1.382(9) | C8B  | C7B  | 1.390(10) |
| N1C | C2C              | 1.322(8) | C8C  | C7C  | 1.424(10) |
| C5B | C10B             | 1.434(8) |      |      |           |

Symmetry code: <sup>1</sup>2-x,2-y,1-z; <sup>2</sup>-1+x,y,z; <sup>3</sup>1-x,2-y,1-z; <sup>4</sup>1-x,1-y,1-z; <sup>5</sup>-x,1-y,-z.

**Table S4.** Bond Lengths for (8) [Eu<sub>2</sub>(Qdca)<sub>3</sub>(H<sub>2</sub>O)<sub>4</sub>].H<sub>2</sub>O.

| Atom | Atom             | Length/Å | Atom | Atom | Length/Å |
|------|------------------|----------|------|------|----------|
| Eu1  | N1A              | 2.830(4) | C4C  | C12C | 1.527(7) |
| Eu1  | N1B <sup>1</sup> | 2.775(4) | C5A  | C6A  | 1.412(8) |
| Eu1  | O1A              | 2.287(4) | C5A  | C10A | 1.420(7) |
| Eu1  | O1B <sup>1</sup> | 2.374(3) | C5B  | C6B  | 1.419(8) |
| Eu1  | O3A <sup>2</sup> | 2.367(4) | C5B  | C10B | 1.425(8) |
| Eu1  | O4A <sup>3</sup> | 2.301(4) | C5C  | C6C  | 1.417(9) |
| Eu1  | O4B              | 2.296(4) | C5C  | C10C | 1.427(7) |
| Eu1  | O4W              | 2.454(4) | C6A  | C7A  | 1.377(9) |
| Eu2  | C11C             | 3.224(5) | C6B  | C7B  | 1.364(9) |
| Eu2  | N1C              | 2.689(5) | C6C  | C7C  | 1.338(9) |
| Eu2  | O1C              | 2.280(4) | C7A  | C8A  | 1.410(9) |
| Eu2  | O1W              | 2.473(5) | C7B  | C8B  | 1.395(9) |
| Eu2  | O2B              | 2.424(4) | C7C  | C8C  | 1.406(9) |
| Eu2  | O2W              | 2.458(5) | C8A  | C9A  | 1.357(9) |
| Eu2  | O3C <sup>2</sup> | 2.376(4) | C8B  | C9B  | 1.359(9) |
| Eu2  | O3W              | 2.462(5) | C8C  | C9C  | 1.355(9) |
| Eu2  | O4C <sup>4</sup> | 2.319(4) | C9A  | C10A | 1.412(8) |
| C2A  | C3A              | 1.403(7) | C9B  | C10B | 1.419(8) |
| C2A  | C11A             | 1.496(8) | C9C  | C10C | 1.411(8) |
| C2A  | N1A              | 1.328(7) | C10A | N1A  | 1.383(7) |
| C2B  | C3B              | 1.410(8) | C10B | N1B  | 1.364(7) |
| C2B  | C11B             | 1.499(8) | C10C | N1C  | 1.381(7) |
| C2B  | N1B              | 1.330(7) | C11A | O1A  | 1.278(7) |
| C2C  | C3C              | 1.412(7) | C11A | O2A  | 1.238(7) |
| C2C  | C11C             | 1.492(8) | C11B | O1B  | 1.257(6) |

|     |      |          |      |     |          |
|-----|------|----------|------|-----|----------|
| C2C | N1C  | 1.327(7) | C11B | O2B | 1.251(7) |
| C3A | C4A  | 1.362(8) | C11C | O1C | 1.278(7) |
| C3B | C4B  | 1.369(8) | C11C | O2C | 1.234(7) |
| C3C | C4C  | 1.354(8) | C12A | O3A | 1.239(7) |
| C4A | C5A  | 1.413(8) | C12A | O4A | 1.254(7) |
| C4A | C12A | 1.533(7) | C12B | O3B | 1.219(7) |
| C4B | C5B  | 1.421(7) | C12B | O4B | 1.273(7) |
| C4B | C12B | 1.510(8) | C12C | O3C | 1.248(7) |
| C4C | C5C  | 1.421(8) | C12C | O4C | 1.245(7) |

Symmetry code: <sup>1</sup>2-x,1-y,1-z; <sup>2</sup>1+x,+y,+z; <sup>3</sup>1-x,-y,1-z; <sup>4</sup>1-x,1-y,2-z.

**Table S5.** Bond Lengths for (9) [Tb<sub>2</sub>(Qdca)<sub>3</sub>(H<sub>2</sub>O)<sub>4</sub>].H<sub>2</sub>O.

| Atom | Atom | Length/Å  | Atom | Atom             | Length/Å |
|------|------|-----------|------|------------------|----------|
| C2A  | C3A  | 1.416(8)  | C9B  | C10B             | 1.419(8) |
| C2A  | C11A | 1.518(8)  | C9C  | C10C             | 1.403(8) |
| C2A  | N1A  | 1.322(7)  | C10A | N1A              | 1.379(7) |
| C2B  | C3B  | 1.406(8)  | C10B | N1B              | 1.386(7) |
| C2B  | C11B | 1.499(8)  | C10C | N1C              | 1.390(7) |
| C2B  | N1B  | 1.321(7)  | C11A | O1A              | 1.262(7) |
| C2C  | C3C  | 1.423(7)  | C11A | O2A              | 1.231(7) |
| C2C  | C11C | 1.511(8)  | C11B | O1B              | 1.257(6) |
| C2C  | N1C  | 1.305(7)  | C11B | O2B              | 1.258(7) |
| C3A  | C4A  | 1.345(8)  | C11C | O1C              | 1.281(7) |
| C3B  | C4B  | 1.361(8)  | C11C | O2C              | 1.221(7) |
| C3C  | C4C  | 1.360(8)  | C12A | O3A              | 1.241(7) |
| C4A  | C5A  | 1.434(8)  | C12A | O4A              | 1.242(7) |
| C4A  | C12A | 1.530(7)  | C12B | O3B              | 1.225(7) |
| C4B  | C5B  | 1.431(8)  | C12B | O4B              | 1.268(7) |
| C4B  | C12B | 1.524(8)  | C12C | O3C              | 1.241(8) |
| C4C  | C5C  | 1.426(8)  | C12C | O4C              | 1.255(7) |
| C4C  | C12C | 1.528(8)  | N1A  | Tb1              | 2.817(5) |
| C5A  | C6A  | 1.408(8)  | N1B  | Tb1 <sup>1</sup> | 2.751(5) |
| C5A  | C10A | 1.410(8)  | N1C  | Tb2              | 2.661(5) |
| C5B  | C6B  | 1.416(8)  | O1A  | Tb1              | 2.269(4) |
| C5B  | C10B | 1.419(8)  | O1B  | Tb1 <sup>1</sup> | 2.349(4) |
| C5C  | C6C  | 1.416(8)  | O1C  | Tb2              | 2.263(4) |
| C5C  | C10C | 1.419(8)  | O1W  | Tb2              | 2.421(4) |
| C6A  | C7A  | 1.373(9)  | O2B  | Tb2              | 2.386(4) |
| C6B  | C7B  | 1.343(9)  | O2W  | Tb2              | 2.431(5) |
| C6C  | C7C  | 1.347(10) | O3A  | Tb1 <sup>2</sup> | 2.340(4) |
| C7A  | C8A  | 1.406(9)  | O3C  | Tb2 <sup>2</sup> | 2.351(4) |
| C7B  | C8B  | 1.388(9)  | O3W  | Tb2              | 2.443(5) |
| C7C  | C8C  | 1.406(10) | O4A  | Tb1 <sup>3</sup> | 2.286(4) |
| C8A  | C9A  | 1.351(9)  | O4B  | Tb1              | 2.263(4) |
| C8B  | C9B  | 1.354(9)  | O4C  | Tb2 <sup>4</sup> | 2.290(4) |
| C8C  | C9C  | 1.353(9)  | O4W  | Tb1              | 2.444(5) |
| C9A  | C10A | 1.431(8)  |      |                  |          |

Symmetry code: <sup>1</sup>2-x,1-y,1-z; <sup>2</sup>1+x,+y,+z; <sup>3</sup>1-x,-y,1-z; <sup>4</sup>1-x,1-y,2-z.

**Table S6.** Bond Lengths for (13) [Er<sub>2</sub>(Qdca)<sub>3</sub>(H<sub>2</sub>O)<sub>4</sub>].4H<sub>2</sub>O.

| Atom | Atom             | Length/Å | Atom | Atom | Length/Å |
|------|------------------|----------|------|------|----------|
| Er1  | N1B <sup>1</sup> | 2.715(3) | C5A  | C6A  | 1.419(6) |
| Er1  | O1A              | 2.236(3) | C5A  | C10A | 1.430(5) |
| Er1  | O1B <sup>1</sup> | 2.320(3) | C5B  | C6B  | 1.425(6) |
| Er1  | O1W              | 2.384(3) | C5B  | C10B | 1.422(5) |
| Er1  | O3A <sup>2</sup> | 2.313(3) | C5C  | C6C  | 1.416(6) |
| Er1  | O4A <sup>3</sup> | 2.249(3) | C5C  | C10C | 1.413(5) |
| Er1  | O4B              | 2.237(3) | C6A  | C7A  | 1.356(7) |
| Er2  | N1C              | 2.601(3) | C6B  | C7B  | 1.350(6) |
| Er2  | O1C              | 2.285(3) | C6C  | C7C  | 1.358(7) |
| Er2  | O2B              | 2.357(3) | C7A  | C8A  | 1.412(7) |
| Er2  | O2W              | 2.380(3) | C7B  | C8B  | 1.406(6) |
| Er2  | O3C <sup>4</sup> | 2.296(3) | C7C  | C8C  | 1.417(7) |
| Er2  | O3W              | 2.357(3) | C8A  | C9A  | 1.363(7) |
| Er2  | O4C <sup>2</sup> | 2.375(3) | C8B  | C9B  | 1.361(6) |
| Er2  | O4W              | 2.291(3) | C8C  | C9C  | 1.360(6) |
| C2A  | C3A              | 1.401(5) | C9A  | C10A | 1.409(6) |
| C2A  | C11A             | 1.518(5) | C9B  | C10B | 1.417(5) |
| C2A  | N1A              | 1.318(5) | C9C  | C10C | 1.415(6) |
| C2B  | C3B              | 1.419(5) | C10A | N1A  | 1.374(5) |
| C2B  | C11B             | 1.507(5) | C10B | N1B  | 1.365(5) |
| C2B  | N1B              | 1.323(5) | C10C | N1C  | 1.375(5) |
| C2C  | C3C              | 1.405(5) | C11A | O1A  | 1.273(5) |
| C2C  | C11C             | 1.506(5) | C11A | O2A  | 1.226(5) |
| C2C  | N1C              | 1.329(5) | C11B | O1B  | 1.249(4) |
| C3A  | C4A              | 1.373(5) | C11B | O2B  | 1.262(5) |
| C3B  | C4B              | 1.370(5) | C11C | O1C  | 1.258(5) |
| C3C  | C4C              | 1.363(6) | C11C | O2C  | 1.238(5) |
| C4A  | C5A              | 1.410(5) | C12A | O3A  | 1.242(5) |
| C4A  | C12A             | 1.530(5) | C12A | O4A  | 1.237(5) |
| C4B  | C5B              | 1.422(5) | C12B | O3B  | 1.232(5) |
| C4B  | C12B             | 1.519(5) | C12B | O4B  | 1.247(5) |
| C4C  | C5C              | 1.423(5) | C12C | O3C  | 1.269(5) |
| C4C  | C12C             | 1.507(5) | C12C | O4C  | 1.232(5) |

Symmetry code: <sup>1</sup>-x,1-y,1-z; <sup>2</sup>-1+x,y,z; <sup>3</sup>1-x,-y,1-z; <sup>4</sup>1-x,1-y,2-z.**Table S7.** Bond Angles for (1) [Nd<sub>2</sub>(Qdca)<sub>3</sub>(H<sub>2</sub>O)<sub>3</sub>].

| Atom | Atom | Atom | Angle/°  | Atom | Atom | Atom             | Angle/°    |
|------|------|------|----------|------|------|------------------|------------|
| C3A  | C2A  | C11A | 121.6(5) | C2C  | N1C  | Nd2 <sup>1</sup> | 111.0(3)   |
| N1A  | C2A  | C3A  | 123.0(5) | C10C | N1C  | Nd2 <sup>1</sup> | 132.0(4)   |
| N1A  | C2A  | C11A | 115.4(5) | C11A | O1A  | Nd1              | 125.9(4)   |
| C3B  | C2B  | C11B | 121.8(5) | C11B | O1B  | Nd2 <sup>2</sup> | 158.6(5)   |
| N1B  | C2B  | C3B  | 122.3(6) | C11C | O1C  | Nd2 <sup>1</sup> | 132.2(4)   |
| N1B  | C2B  | C11B | 115.8(5) | C11A | O2A  | Nd2 <sup>2</sup> | 116.4(3)   |
| C3C  | C2C  | C11C | 119.6(5) | C11B | O2B  | Nd1              | 139.4(4)   |
| N1C  | C2C  | C3C  | 123.7(5) | C12A | O3A  | Nd1 <sup>3</sup> | 155.2(4)   |
| N1C  | C2C  | C11C | 116.7(5) | C12B | O3B  | Nd2              | 154.4(5)   |
| C4A  | C3A  | C2A  | 119.2(5) | C12C | O3C  | Nd1              | 92.9(3)    |
| C4B  | C3B  | C2B  | 118.9(5) | C12A | O4A  | Nd1 <sup>4</sup> | 159.3(5)   |
| C4C  | C3C  | C2C  | 120.8(6) | C12B | O4B  | Nd2 <sup>5</sup> | 149.9(5)   |
| C3A  | C4A  | C5A  | 119.2(5) | C12C | O4C  | Nd1              | 94.3(3)    |
| C3A  | C4A  | C12A | 124.4(5) | N1A  | Nd1  | C12C             | 124.10(15) |
| C5A  | C4A  | C12A | 116.4(4) | O1A  | Nd1  | C12C             | 170.29(19) |

|      |      |      |          |                  |     |                  |            |
|------|------|------|----------|------------------|-----|------------------|------------|
| C3B  | C4B  | C5B  | 120.4(5) | O1A              | Nd1 | N1A              | 62.19(14)  |
| C3B  | C4B  | C12B | 120.5(5) | O1A              | Nd1 | O1W              | 77.1(2)    |
| C5B  | C4B  | C12B | 119.0(5) | O1A              | Nd1 | O3A <sup>4</sup> | 90.36(18)  |
| C3C  | C4C  | C5C  | 118.4(5) | O1A              | Nd1 | O3C              | 157.32(16) |
| C3C  | C4C  | C12C | 117.7(5) | O1A              | Nd1 | O4A <sup>3</sup> | 110.02(19) |
| C5C  | C4C  | C12C | 123.8(5) | O1A              | Nd1 | O4C              | 148.51(14) |
| C4A  | C5A  | C6A  | 123.3(5) | O1W              | Nd1 | C12C             | 93.3(2)    |
| C4A  | C5A  | C10A | 118.5(5) | O1W              | Nd1 | N1A              | 125.1(2)   |
| C10A | C5A  | C6A  | 118.2(5) | O1W              | Nd1 | O3A <sup>4</sup> | 69.51(19)  |
| C4B  | C5B  | C10B | 116.2(5) | O1W              | Nd1 | O3C              | 108.2(2)   |
| C6B  | C5B  | C4B  | 124.9(5) | O1W              | Nd1 | O4C              | 77.6(2)    |
| C6B  | C5B  | C10B | 118.9(5) | O2B              | Nd1 | C12C             | 102.61(18) |
| C4C  | C5C  | C6C  | 124.1(6) | O2B              | Nd1 | N1A              | 119.39(18) |
| C4C  | C5C  | C10C | 117.7(6) | O2B              | Nd1 | O1A              | 78.01(16)  |
| C10C | C5C  | C6C  | 118.1(6) | O2B              | Nd1 | O1W              | 82.9(2)    |
| C7A  | C6A  | C5A  | 120.8(5) | O2B              | Nd1 | O3A <sup>4</sup> | 151.86(19) |
| C7B  | C6B  | C5B  | 120.4(6) | O2B              | Nd1 | O3C              | 124.11(19) |
| C7C  | C6C  | C5C  | 120.5(6) | O2B              | Nd1 | O4A <sup>3</sup> | 76.9(2)    |
| C6A  | C7A  | C8A  | 120.1(5) | O2B              | Nd1 | O4C              | 80.54(16)  |
| C6B  | C7B  | C8B  | 120.2(6) | O3A <sup>4</sup> | Nd1 | C12C             | 84.7(2)    |
| C6C  | C7C  | C8C  | 121.1(6) | O3A <sup>4</sup> | Nd1 | N1A              | 75.2(2)    |
| C9A  | C8A  | C7A  | 121.7(5) | O3A <sup>4</sup> | Nd1 | O3C              | 71.9(2)    |
| C9B  | C8B  | C7B  | 121.0(6) | O3A <sup>4</sup> | Nd1 | O4C              | 98.03(19)  |
| C9C  | C8C  | C7C  | 120.5(6) | O3C              | Nd1 | C12C             | 25.66(15)  |
| C8A  | C9A  | C10A | 119.2(5) | O3C              | Nd1 | N1A              | 98.77(13)  |
| C8B  | C9B  | C10B | 120.2(6) | O4A <sup>3</sup> | Nd1 | C12C             | 79.4(2)    |
| C8C  | C9C  | C10C | 120.5(6) | O4A <sup>3</sup> | Nd1 | N1A              | 76.4(2)    |
| C5A  | C10A | C9A  | 120.0(5) | O4A <sup>3</sup> | Nd1 | O1W              | 156.3(2)   |
| N1A  | C10A | C5A  | 121.4(4) | O4A <sup>3</sup> | Nd1 | O3A <sup>4</sup> | 131.19(14) |
| N1A  | C10A | C9A  | 118.6(5) | O4A <sup>3</sup> | Nd1 | O3C              | 74.2(2)    |
| C9B  | C10B | C5B  | 119.3(6) | O4A <sup>3</sup> | Nd1 | O4C              | 87.0(2)    |
| N1B  | C10B | C5B  | 122.2(5) | O4C              | Nd1 | C12C             | 25.72(16)  |
| N1B  | C10B | C9B  | 118.3(5) | O4C              | Nd1 | N1A              | 149.30(14) |
| C9C  | C10C | C5C  | 119.2(6) | O4C              | Nd1 | O3C              | 51.37(14)  |
| N1C  | C10C | C5C  | 122.5(6) | O1B <sup>1</sup> | Nd2 | N1C <sup>2</sup> | 142.66(18) |
| N1C  | C10C | C9C  | 118.3(6) | O1C <sup>2</sup> | Nd2 | N1C <sup>2</sup> | 61.18(14)  |
| O1A  | C11A | C2A  | 115.5(5) | O1C <sup>2</sup> | Nd2 | O1B <sup>1</sup> | 131.58(15) |
| O2A  | C11A | C2A  | 121.1(5) | O1C <sup>2</sup> | Nd2 | O2A <sup>1</sup> | 143.23(15) |
| O2A  | C11A | O1A  | 123.4(5) | O1C <sup>2</sup> | Nd2 | O2W              | 66.01(15)  |
| O1B  | C11B | C2B  | 117.8(5) | O1C <sup>2</sup> | Nd2 | O3W              | 89.76(18)  |
| O1B  | C11B | O2B  | 125.2(6) | O1C <sup>2</sup> | Nd2 | O4B <sup>6</sup> | 71.12(16)  |
| O2B  | C11B | C2B  | 117.0(5) | O2A <sup>1</sup> | Nd2 | N1C <sup>2</sup> | 85.63(13)  |
| O1C  | C11C | C2C  | 118.5(5) | O2A <sup>1</sup> | Nd2 | O1B <sup>1</sup> | 84.27(16)  |
| O2C  | C11C | C2C  | 117.8(5) | O2W              | Nd2 | N1C <sup>2</sup> | 113.31(17) |
| O2C  | C11C | O1C  | 123.7(6) | O2W              | Nd2 | O1B <sup>1</sup> | 65.57(16)  |
| O3A  | C12A | C4A  | 116.7(7) | O2W              | Nd2 | O2A <sup>1</sup> | 148.86(18) |
| O4A  | C12A | C4A  | 117.3(8) | O2W              | Nd2 | O3W              | 78.8(2)    |
| O4A  | C12A | O3A  | 126.0(5) | O2W              | Nd2 | O4B <sup>6</sup> | 126.54(19) |
| O3B  | C12B | C4B  | 115.8(7) | O3B              | Nd2 | N1C <sup>2</sup> | 71.95(19)  |
| O4B  | C12B | C4B  | 120.0(7) | O3B              | Nd2 | O1B <sup>1</sup> | 71.71(18)  |
| O4B  | C12B | O3B  | 124.2(5) | O3B              | Nd2 | O1C <sup>2</sup> | 96.27(17)  |
| C4C  | C12C | Nd1  | 177.7(5) | O3B              | Nd2 | O2A <sup>1</sup> | 87.1(2)    |
| O3C  | C12C | C4C  | 119.9(5) | O3B              | Nd2 | O2W              | 76.6(2)    |
| O3C  | C12C | O4C  | 121.3(5) | O3B              | Nd2 | O3W              | 149.5(2)   |

|      |      |      |          |                  |     |                  |            |
|------|------|------|----------|------------------|-----|------------------|------------|
| O3C  | C12C | Nd1  | 61.4(3)  | O3B              | Nd2 | O4B <sup>6</sup> | 139.57(18) |
| O4C  | C12C | C4C  | 118.7(5) | O3W              | Nd2 | N1C <sup>2</sup> | 135.36(19) |
| O4C  | C12C | Nd1  | 60.0(3)  | O3W              | Nd2 | O1B <sup>1</sup> | 81.96(19)  |
| C2A  | N1A  | C10A | 118.6(4) | O3W              | Nd2 | O2A <sup>1</sup> | 105.6(2)   |
| C2A  | N1A  | Nd1  | 116.5(3) | O3W              | Nd2 | O4B <sup>6</sup> | 70.5(2)    |
| C10A | N1A  | Nd1  | 124.9(3) | O4B <sup>6</sup> | Nd2 | N1C <sup>2</sup> | 68.35(18)  |
| C2B  | N1B  | C10B | 119.9(5) | O4B <sup>6</sup> | Nd2 | O1B <sup>1</sup> | 144.86(17) |
| C2C  | N1C  | C10C | 117.0(5) | O4B <sup>6</sup> | Nd2 | O2A <sup>1</sup> | 82.7(2)    |

Symmetry codes: <sup>1</sup>1/2+x,3/2-y,+z; <sup>2</sup>-1/2+x,3/2-y,+z; <sup>3</sup>1-x,1-y,-1/2+z; <sup>4</sup>1-x,1-y,1/2+z; <sup>5</sup>+x,+y,-1+z; <sup>6</sup>+x,+y,1+z.

**Table S8.** Bond Angles for (4) [Nd<sub>2</sub>(Qdca)<sub>3</sub>(H<sub>2</sub>O)<sub>4</sub>]·3H<sub>2</sub>O.

| Atom             | Atom | Atom             | Angle/°    | Atom | Atom | Atom             | Angle/°  |
|------------------|------|------------------|------------|------|------|------------------|----------|
| O1A <sup>1</sup> | Nd1  | O2A <sup>2</sup> | 73.53(16)  | C2C  | N1C  | Nd2 <sup>5</sup> | 111.9(4) |
| O1A <sup>1</sup> | Nd1  | O2B <sup>3</sup> | 79.32(16)  | C2C  | N1C  | C10C             | 117.9(5) |
| O1A <sup>1</sup> | Nd1  | N1A <sup>1</sup> | 61.64(16)  | C4B  | C5B  | C10B             | 117.9(6) |
| O1A <sup>1</sup> | Nd1  | O1W              | 140.7(2)   | C4B  | C5B  | C6B              | 123.5(6) |
| O1A <sup>1</sup> | Nd1  | O4W              | 156.3(2)   | C6B  | C5B  | C10B             | 118.6(6) |
| O4A              | Nd1  | O1A <sup>1</sup> | 91.86(17)  | N1B  | C10B | C5B              | 122.7(6) |
| O4A              | Nd1  | O2A <sup>2</sup> | 149.90(18) | N1B  | C10B | C9B              | 118.8(6) |
| O4A              | Nd1  | O2B <sup>3</sup> | 76.04(17)  | C9B  | C10B | C5B              | 118.5(6) |
| O4A              | Nd1  | O4B              | 130.47(18) | C5B  | C4B  | C12B             | 122.7(6) |
| O4A              | Nd1  | N1A <sup>1</sup> | 71.75(16)  | C3B  | C4B  | C5B              | 118.4(6) |
| O4A              | Nd1  | O1W              | 107.2(2)   | C3B  | C4B  | C12B             | 118.9(6) |
| O4A              | Nd1  | O4W              | 73.4(2)    | N1A  | C10A | C5A              | 122.3(6) |
| O2A <sup>2</sup> | Nd1  | N1A <sup>1</sup> | 119.94(16) | N1A  | C10A | C9A              | 118.1(6) |
| O2A <sup>2</sup> | Nd1  | O4W              | 127.8(2)   | C9A  | C10A | C5A              | 119.5(6) |
| O2B <sup>3</sup> | Nd1  | O2A <sup>2</sup> | 75.46(17)  | C4B  | C3B  | C2B              | 120.0(6) |
| O2B <sup>3</sup> | Nd1  | N1A <sup>1</sup> | 127.37(16) | C5A  | C4A  | C12A             | 123.7(6) |
| O2B <sup>3</sup> | Nd1  | O1W              | 72.8(2)    | C3A  | C4A  | C5A              | 118.5(6) |
| O2B <sup>3</sup> | Nd1  | O4W              | 113.7(2)   | C3A  | C4A  | C12A             | 117.6(6) |
| O4B              | Nd1  | O1A <sup>1</sup> | 100.93(17) | C10A | C5A  | C4A              | 117.4(6) |
| O4B              | Nd1  | O2A <sup>2</sup> | 78.92(18)  | C6A  | C5A  | C10A             | 118.1(6) |
| O4B              | Nd1  | O2B <sup>3</sup> | 153.19(18) | C6A  | C5A  | C4A              | 124.5(6) |
| O4B              | Nd1  | N1A <sup>1</sup> | 73.07(16)  | N1B  | C2B  | C3B              | 123.2(6) |
| O4B              | Nd1  | O1W              | 92.3(2)    | N1B  | C2B  | C11B             | 116.6(5) |
| O4B              | Nd1  | O4W              | 76.6(2)    | C3B  | C2B  | C11B             | 120.2(6) |
| O1W              | Nd1  | O2A <sup>2</sup> | 73.1(2)    | C10C | C5C  | C6C              | 117.9(6) |
| O1W              | Nd1  | N1A <sup>1</sup> | 156.7(2)   | C4C  | C5C  | C6C              | 123.4(6) |
| O1W              | Nd1  | O4W              | 62.8(3)    | C4C  | C5C  | C10C             | 118.7(6) |
| O4W              | Nd1  | N1A <sup>1</sup> | 95.6(2)    | C4A  | C3A  | C2A              | 120.3(6) |
| O3B              | Nd2  | O1B <sup>4</sup> | 105.81(17) | O3B  | C12B | C4B              | 116.7(6) |
| O3B              | Nd2  | O1C <sup>5</sup> | 138.61(17) | O4B  | C12B | O3B              | 125.5(6) |
| O3B              | Nd2  | O3W              | 146.89(19) | O4B  | C12B | C4B              | 117.8(6) |
| O3B              | Nd2  | N1B <sup>4</sup> | 73.48(16)  | N1A  | C2A  | C3A              | 123.2(6) |
| O3B              | Nd2  | N1C <sup>5</sup> | 87.50(16)  | N1A  | C2A  | C11A             | 115.6(5) |
| O3B              | Nd2  | O2W              | 73.4(2)    | C3A  | C2A  | C11A             | 121.1(6) |
| O1B <sup>4</sup> | Nd2  | O3W              | 72.4(2)    | C8B  | C9B  | C10B             | 119.6(6) |
| O1B <sup>4</sup> | Nd2  | N1B <sup>4</sup> | 62.48(16)  | C7B  | C6B  | C5B              | 120.4(6) |
| O1B <sup>4</sup> | Nd2  | N1C <sup>5</sup> | 140.09(17) | C7C  | C6C  | C5C              | 121.3(7) |
| O1B <sup>4</sup> | Nd2  | O2W              | 69.72(19)  | O4A  | C12A | C4A              | 118.0(6) |
| O1C <sup>5</sup> | Nd2  | O1B <sup>4</sup> | 82.60(16)  | O3A  | C12A | O4A              | 124.8(6) |
| O1C <sup>5</sup> | Nd2  | O3W              | 74.50(19)  | O3A  | C12A | C4A              | 117.1(6) |
| O1C <sup>5</sup> | Nd2  | N1B <sup>4</sup> | 140.17(15) | O1A  | C11A | C2A              | 115.4(6) |

|                  |     |                  |            |     |      |      |          |
|------------------|-----|------------------|------------|-----|------|------|----------|
| O1C <sup>5</sup> | Nd2 | N1C <sup>5</sup> | 64.23(16)  | O2A | C11A | O1A  | 125.7(6) |
| O1C <sup>5</sup> | Nd2 | O2W              | 72.0(2)    | O2A | C11A | C2A  | 118.9(6) |
| O4C              | Nd2 | O3B              | 92.59(19)  | O1B | C11B | C2B  | 117.0(6) |
| O4C              | Nd2 | O1B <sup>4</sup> | 142.29(18) | O2B | C11B | O1B  | 124.3(6) |
| O4C              | Nd2 | O1C <sup>5</sup> | 105.10(18) | O2B | C11B | C2B  | 118.6(6) |
| O4C              | Nd2 | O3W              | 74.3(2)    | C8A | C9A  | C10A | 120.8(7) |
| O4C              | Nd2 | N1B <sup>4</sup> | 93.12(16)  | N1C | C10C | C5C  | 121.7(6) |
| O4C              | Nd2 | N1C <sup>5</sup> | 71.68(17)  | N1C | C10C | C9C  | 118.9(6) |
| O4C              | Nd2 | O2W              | 148.0(2)   | C9C | C10C | C5C  | 119.4(6) |
| O3W              | Nd2 | N1B <sup>4</sup> | 76.97(18)  | N1C | C2C  | C3C  | 123.0(6) |
| O3W              | Nd2 | N1C <sup>5</sup> | 115.53(19) | N1C | C2C  | C11C | 117.0(6) |
| O3W              | Nd2 | O2W              | 131.8(2)   | C3C | C2C  | C11C | 120.0(6) |
| N1B <sup>4</sup> | Nd2 | N1C <sup>5</sup> | 155.28(16) | C5C | C4C  | C12C | 123.5(6) |
| O2W              | Nd2 | N1B <sup>4</sup> | 109.45(18) | C3C | C4C  | C5C  | 118.2(6) |
| O2W              | Nd2 | N1C <sup>5</sup> | 78.92(18)  | C3C | C4C  | C12C | 118.3(6) |
| C11A             | O1A | Nd1 <sup>1</sup> | 126.9(4)   | C8C | C9C  | C10C | 121.2(7) |
| C12B             | O3B | Nd2              | 173.7(4)   | C4C | C3C  | C2C  | 120.3(6) |
| C12A             | O4A | Nd1              | 159.6(5)   | C7A | C6A  | C5A  | 120.6(7) |
| C11A             | O2A | Nd1 <sup>6</sup> | 128.9(4)   | C6A | C7A  | C8A  | 120.7(7) |
| C11B             | O1B | Nd2 <sup>4</sup> | 128.9(4)   | O1C | C11C | C2C  | 117.3(6) |
| C11B             | O2B | Nd1 <sup>3</sup> | 146.4(5)   | O2C | C11C | O1C  | 124.7(7) |
| C12B             | O4B | Nd1              | 161.6(4)   | O2C | C11C | C2C  | 118.0(6) |
| C11C             | O1C | Nd2 <sup>5</sup> | 124.4(4)   | C9B | C8B  | C7B  | 121.8(6) |
| C12C             | O4C | Nd2              | 171.2(5)   | C6B | C7B  | C8B  | 121.0(7) |
| C10A             | N1A | Nd1 <sup>1</sup> | 128.8(4)   | O4C | C12C | C4C  | 117.3(6) |
| C2A              | N1A | Nd1 <sup>1</sup> | 113.0(4)   | O3C | C12C | O4C  | 125.5(7) |
| C2A              | N1A | C10A             | 117.9(5)   | O3C | C12C | C4C  | 117.2(6) |
| C10B             | N1B | Nd2 <sup>4</sup> | 127.1(4)   | C9A | C8A  | C7A  | 120.3(7) |
| C2B              | N1B | Nd2 <sup>4</sup> | 114.3(4)   | C9C | C8C  | C7C  | 120.1(7) |
| C2B              | N1B | C10B             | 117.8(5)   | C6C | C7C  | C8C  | 120.0(7) |
| C10C             | N1C | Nd2 <sup>5</sup> | 127.8(4)   |     |      |      |          |

Symmetry codes: <sup>1</sup>2-x,2-y,1-z; <sup>2</sup>-1+x,+y,+z; <sup>3</sup>1-x,2-y,1-z; <sup>4</sup>1-x,1-y,1-z; <sup>5</sup>-x,1-y,-z; <sup>6</sup>1+x,+y,+z.

**Table S9.** Bond Angles for (8) [Eu<sub>2</sub>(Qdca)<sub>3</sub>(H<sub>2</sub>O)<sub>4</sub>].H<sub>2</sub>O.

| Atom             | Atom | Atom             | Angle/°    | Atom | Atom | Atom | Angle/°  |
|------------------|------|------------------|------------|------|------|------|----------|
| N1B <sup>1</sup> | Eu1  | N1A              | 86.89(12)  | C3A  | C4A  | C12A | 116.1(5) |
| O1A              | Eu1  | N1A              | 62.30(13)  | C5A  | C4A  | C12A | 125.4(5) |
| O1A              | Eu1  | N1B <sup>1</sup> | 76.98(15)  | C3B  | C4B  | C5B  | 117.9(5) |
| O1A              | Eu1  | O1B <sup>1</sup> | 83.12(14)  | C3B  | C4B  | C12B | 120.4(5) |
| O1A              | Eu1  | O3A <sup>2</sup> | 146.39(14) | C5B  | C4B  | C12B | 121.7(5) |
| O1A              | Eu1  | O4A <sup>3</sup> | 99.33(15)  | C3C  | C4C  | C5C  | 119.4(5) |
| O1A              | Eu1  | O4B              | 136.45(15) | C3C  | C4C  | C12C | 117.7(5) |
| O1A              | Eu1  | O4W              | 77.08(16)  | C5C  | C4C  | C12C | 122.9(5) |
| O1B <sup>1</sup> | Eu1  | N1A              | 138.37(13) | C4A  | C5A  | C10A | 117.5(5) |
| O1B <sup>1</sup> | Eu1  | N1B <sup>1</sup> | 61.91(13)  | C6A  | C5A  | C4A  | 124.2(5) |
| O1B <sup>1</sup> | Eu1  | O4W              | 75.37(15)  | C6A  | C5A  | C10A | 118.2(5) |
| O3A <sup>2</sup> | Eu1  | N1A              | 147.69(13) | C4B  | C5B  | C10B | 118.2(5) |
| O3A <sup>2</sup> | Eu1  | N1B <sup>1</sup> | 110.47(14) | C6B  | C5B  | C4B  | 123.1(5) |
| O3A <sup>2</sup> | Eu1  | O1B <sup>1</sup> | 73.14(13)  | C6B  | C5B  | C10B | 118.8(5) |
| O3A <sup>2</sup> | Eu1  | O4W              | 74.17(15)  | C4C  | C5C  | C10C | 117.3(5) |
| O4A <sup>3</sup> | Eu1  | N1A              | 67.31(13)  | C6C  | C5C  | C4C  | 124.6(5) |
| O4A <sup>3</sup> | Eu1  | N1B <sup>1</sup> | 151.81(13) | C6C  | C5C  | C10C | 118.1(5) |
| O4A <sup>3</sup> | Eu1  | O1B <sup>1</sup> | 146.08(14) | C7A  | C6A  | C5A  | 121.2(5) |
| O4A <sup>3</sup> | Eu1  | O3A <sup>2</sup> | 88.24(14)  | C7B  | C6B  | C5B  | 121.0(6) |



|                  |     |                  |            |      |      |                  |          |
|------------------|-----|------------------|------------|------|------|------------------|----------|
| O4A <sup>3</sup> | Eu1 | O4W              | 72.32(15)  | C7C  | C6C  | C5C              | 120.5(6) |
| O4B              | Eu1 | N1A              | 83.92(14)  | C6A  | C7A  | C8A              | 119.6(6) |
| O4B              | Eu1 | N1B <sup>1</sup> | 74.39(14)  | C6B  | C7B  | C8B              | 119.8(6) |
| O4B              | Eu1 | O1B <sup>1</sup> | 110.46(14) | C6C  | C7C  | C8C              | 121.8(6) |
| O4B              | Eu1 | O3A <sup>2</sup> | 75.43(15)  | C9A  | C8A  | C7A              | 120.7(6) |
| O4B              | Eu1 | O4A <sup>3</sup> | 91.10(15)  | C9B  | C8B  | C7B              | 121.5(6) |
| O4B              | Eu1 | O4W              | 145.60(15) | C9C  | C8C  | C7C              | 119.8(6) |
| O4W              | Eu1 | N1A              | 114.89(14) | C8A  | C9A  | C10A             | 120.7(5) |
| O4W              | Eu1 | N1B <sup>1</sup> | 131.95(14) | C8B  | C9B  | C10B             | 120.6(6) |
| N1C              | Eu2 | C11C             | 47.03(14)  | C8C  | C9C  | C10C             | 120.6(5) |
| O1C              | Eu2 | C11C             | 18.28(15)  | C9A  | C10A | C5A              | 119.5(5) |
| O1C              | Eu2 | N1C              | 65.08(15)  | N1A  | C10A | C5A              | 123.0(5) |
| O1C              | Eu2 | O1W              | 78.69(18)  | N1A  | C10A | C9A              | 117.5(5) |
| O1C              | Eu2 | O2B              | 146.63(16) | C9B  | C10B | C5B              | 118.4(5) |
| O1C              | Eu2 | O2W              | 75.81(16)  | N1B  | C10B | C5B              | 122.8(5) |
| O1C              | Eu2 | O3C <sup>2</sup> | 137.11(16) | N1B  | C10B | C9B              | 118.8(5) |
| O1C              | Eu2 | O3W              | 73.15(17)  | C9C  | C10C | C5C              | 119.2(5) |
| O1C              | Eu2 | O4C <sup>4</sup> | 103.43(16) | N1C  | C10C | C5C              | 122.0(5) |
| O1W              | Eu2 | C11C             | 92.85(17)  | N1C  | C10C | C9C              | 118.8(5) |
| O1W              | Eu2 | N1C              | 132.38(16) | O1A  | C11A | C2A              | 116.8(5) |
| O2B              | Eu2 | C11C             | 131.60(15) | O2A  | C11A | C2A              | 119.8(5) |
| O2B              | Eu2 | N1C              | 91.68(14)  | O2A  | C11A | O1A              | 123.4(5) |
| O2B              | Eu2 | O1W              | 104.15(19) | O1B  | C11B | C2B              | 117.6(5) |
| O2B              | Eu2 | O2W              | 74.45(15)  | O2B  | C11B | C2B              | 117.6(5) |
| O2B              | Eu2 | O3W              | 140.10(16) | O2B  | C11B | O1B              | 124.8(5) |
| O2W              | Eu2 | C11C             | 70.05(15)  | C2C  | C11C | Eu2              | 83.7(3)  |
| O2W              | Eu2 | N1C              | 72.71(15)  | O1C  | C11C | Eu2              | 34.0(3)  |
| O2W              | Eu2 | O1W              | 69.10(19)  | O1C  | C11C | C2C              | 116.5(5) |
| O2W              | Eu2 | O3W              | 136.04(19) | O2C  | C11C | Eu2              | 156.4(4) |
| O3C <sup>2</sup> | Eu2 | C11C             | 155.10(17) | O2C  | C11C | C2C              | 118.5(5) |
| O3C <sup>2</sup> | Eu2 | N1C              | 154.36(15) | O2C  | C11C | O1C              | 125.0(6) |
| O3C <sup>2</sup> | Eu2 | O1W              | 72.30(17)  | O3A  | C12A | C4A              | 115.5(5) |
| O3C <sup>2</sup> | Eu2 | O2B              | 72.56(16)  | O3A  | C12A | O4A              | 126.8(5) |
| O3C <sup>2</sup> | Eu2 | O2W              | 119.91(16) | O4A  | C12A | C4A              | 117.7(5) |
| O3C <sup>2</sup> | Eu2 | O3W              | 69.25(18)  | O3B  | C12B | C4B              | 120.2(5) |
| O3W              | Eu2 | C11C             | 87.86(17)  | O3B  | C12B | O4B              | 125.1(5) |
| O3W              | Eu2 | N1C              | 118.93(17) | O4B  | C12B | C4B              | 114.8(5) |
| O3W              | Eu2 | O1W              | 74.8(2)    | O3C  | C12C | C4C              | 115.8(5) |
| O4C <sup>4</sup> | Eu2 | C11C             | 96.73(15)  | O4C  | C12C | C4C              | 118.7(5) |
| O4C <sup>4</sup> | Eu2 | N1C              | 71.60(14)  | O4C  | C12C | O3C              | 125.4(5) |
| O4C <sup>4</sup> | Eu2 | O1W              | 150.29(19) | C2A  | N1A  | Eu1              | 110.0(3) |
| O4C <sup>4</sup> | Eu2 | O2B              | 90.25(16)  | C2A  | N1A  | C10A             | 117.0(4) |
| O4C <sup>4</sup> | Eu2 | O2W              | 140.53(17) | C10A | N1A  | Eu1              | 132.0(3) |
| O4C <sup>4</sup> | Eu2 | O3C <sup>2</sup> | 87.99(15)  | C2B  | N1B  | Eu1 <sup>1</sup> | 113.4(3) |
| O4C <sup>4</sup> | Eu2 | O3W              | 77.5(2)    | C2B  | N1B  | C10B             | 117.1(5) |
| C3A              | C2A | C11A             | 119.5(5)   | C10B | N1B  | Eu1 <sup>1</sup> | 129.0(3) |
| N1A              | C2A | C3A              | 122.9(5)   | C2C  | N1C  | Eu2              | 111.1(4) |
| N1A              | C2A | C11A             | 117.5(5)   | C2C  | N1C  | C10C             | 118.1(5) |
| C3B              | C2B | C11B             | 120.3(5)   | C10C | N1C  | Eu2              | 130.1(3) |
| N1B              | C2B | C3B              | 123.7(5)   | C11A | O1A  | Eu1              | 132.4(4) |
| N1B              | C2B | C11B             | 116.0(5)   | C11B | O1B  | Eu1 <sup>1</sup> | 130.3(3) |
| C3C              | C2C | C11C             | 119.9(5)   | C11C | O1C  | Eu2              | 127.7(4) |
| N1C              | C2C | C3C              | 122.7(5)   | C11B | O2B  | Eu2              | 128.0(4) |
| N1C              | C2C | C11C             | 117.4(5)   | C12A | O3A  | Eu1 <sup>5</sup> | 138.8(4) |

|     |     |     |          |      |     |                  |          |
|-----|-----|-----|----------|------|-----|------------------|----------|
| C4A | C3A | C2A | 121.1(5) | C12C | O3C | Eu2 <sup>5</sup> | 138.7(4) |
| C4B | C3B | C2B | 120.1(5) | C12A | O4A | Eu1 <sup>3</sup> | 157.1(4) |
| C4C | C3C | C2C | 120.2(5) | C12B | O4B | Eu1              | 174.7(4) |
| C3A | C4A | C5A | 118.4(5) | C12C | O4C | Eu2 <sup>4</sup> | 166.7(5) |

Symmetry codes: <sup>1</sup>2-x,1-y,1-z; <sup>2</sup>1+x,y,z; <sup>3</sup>1-x,-y,1-z; <sup>4</sup>1-x,1-y,2-z; <sup>5</sup>-1+x,y,z.

**Table S10.** Bond Angles for (9) [Tb<sub>2</sub>(Qdca)<sub>3</sub>(H<sub>2</sub>O)<sub>4</sub>].H<sub>2</sub>O.

| Atom | Atom | Atom | Angle/°  | Atom             | Atom | Atom             | Angle/°    |
|------|------|------|----------|------------------|------|------------------|------------|
| C3A  | C2A  | C11A | 119.5(5) | C2B              | N1B  | C10B             | 116.1(5)   |
| N1A  | C2A  | C3A  | 122.7(5) | C2B              | N1B  | Tb1 <sup>1</sup> | 114.0(4)   |
| N1A  | C2A  | C11A | 117.8(5) | C10B             | N1B  | Tb1 <sup>1</sup> | 129.4(3)   |
| C3B  | C2B  | C11B | 120.0(5) | C2C              | N1C  | C10C             | 117.9(5)   |
| N1B  | C2B  | C3B  | 124.7(6) | C2C              | N1C  | Tb2              | 111.2(4)   |
| N1B  | C2B  | C11B | 115.3(5) | C10C             | N1C  | Tb2              | 130.1(4)   |
| C3C  | C2C  | C11C | 118.4(5) | C11A             | O1A  | Tb1              | 132.7(4)   |
| N1C  | C2C  | C3C  | 123.7(5) | C11B             | O1B  | Tb1 <sup>1</sup> | 130.6(4)   |
| N1C  | C2C  | C11C | 117.9(5) | C11C             | O1C  | Tb2              | 127.4(4)   |
| C4A  | C3A  | C2A  | 121.1(5) | C11B             | O2B  | Tb2              | 129.2(4)   |
| C4B  | C3B  | C2B  | 120.0(5) | C12A             | O3A  | Tb1 <sup>2</sup> | 139.3(4)   |
| C4C  | C3C  | C2C  | 119.3(6) | C12C             | O3C  | Tb2 <sup>2</sup> | 139.1(4)   |
| C3A  | C4A  | C5A  | 118.8(5) | C12A             | O4A  | Tb1 <sup>3</sup> | 157.4(4)   |
| C3A  | C4A  | C12A | 115.9(5) | C12B             | O4B  | Tb1              | 173.7(4)   |
| C5A  | C4A  | C12A | 125.1(5) | C12C             | O4C  | Tb2 <sup>4</sup> | 168.1(5)   |
| C3B  | C4B  | C5B  | 118.4(5) | N1B <sup>1</sup> | Tb1  | N1A              | 86.80(13)  |
| C3B  | C4B  | C12B | 121.1(5) | O1A              | Tb1  | N1A              | 62.96(14)  |
| C5B  | C4B  | C12B | 120.5(5) | O1A              | Tb1  | N1B <sup>1</sup> | 76.83(15)  |
| C3C  | C4C  | C5C  | 119.4(5) | O1A              | Tb1  | O1B <sup>1</sup> | 82.97(14)  |
| C3C  | C4C  | C12C | 116.8(5) | O1A              | Tb1  | O3A <sup>5</sup> | 146.44(15) |
| C5C  | C4C  | C12C | 123.7(5) | O1A              | Tb1  | O4A <sup>3</sup> | 99.13(15)  |
| C6A  | C5A  | C4A  | 123.8(5) | O1A              | Tb1  | O4W              | 76.85(16)  |
| C6A  | C5A  | C10A | 119.8(5) | O1B <sup>1</sup> | Tb1  | N1A              | 138.74(13) |
| C10A | C5A  | C4A  | 116.4(5) | O1B <sup>1</sup> | Tb1  | N1B <sup>1</sup> | 62.00(14)  |
| C6B  | C5B  | C4B  | 123.7(5) | O1B <sup>1</sup> | Tb1  | O4W              | 74.84(15)  |
| C6B  | C5B  | C10B | 118.8(5) | O3A <sup>5</sup> | Tb1  | N1A              | 146.96(14) |
| C10B | C5B  | C4B  | 117.5(5) | O3A <sup>5</sup> | Tb1  | N1B <sup>1</sup> | 110.83(14) |
| C6C  | C5C  | C4C  | 124.0(5) | O3A <sup>5</sup> | Tb1  | O1B <sup>1</sup> | 73.43(14)  |
| C6C  | C5C  | C10C | 118.7(6) | O3A <sup>5</sup> | Tb1  | O4W              | 74.19(16)  |
| C10C | C5C  | C4C  | 117.2(5) | O4A <sup>3</sup> | Tb1  | N1A              | 67.29(14)  |
| C7A  | C6A  | C5A  | 119.9(6) | O4A <sup>3</sup> | Tb1  | N1B <sup>1</sup> | 152.00(15) |
| C7B  | C6B  | C5B  | 120.9(6) | O4A <sup>3</sup> | Tb1  | O1B <sup>1</sup> | 145.74(15) |
| C7C  | C6C  | C5C  | 120.6(6) | O4A <sup>3</sup> | Tb1  | O3A <sup>5</sup> | 88.03(15)  |
| C6A  | C7A  | C8A  | 120.6(6) | O4A <sup>3</sup> | Tb1  | O4W              | 72.45(16)  |
| C6B  | C7B  | C8B  | 120.7(6) | O4B              | Tb1  | N1A              | 83.02(14)  |
| C6C  | C7C  | C8C  | 120.3(6) | O4B              | Tb1  | N1B <sup>1</sup> | 74.23(14)  |
| C9A  | C8A  | C7A  | 120.6(6) | O4B              | Tb1  | O1A              | 136.09(16) |
| C9B  | C8B  | C7B  | 120.8(6) | O4B              | Tb1  | O1B <sup>1</sup> | 110.65(14) |
| C9C  | C8C  | C7C  | 120.8(6) | O4B              | Tb1  | O3A <sup>5</sup> | 75.79(16)  |
| C8A  | C9A  | C10A | 120.6(5) | O4B              | Tb1  | O4A <sup>3</sup> | 91.57(15)  |
| C8B  | C9B  | C10B | 120.7(6) | O4B              | Tb1  | O4W              | 146.27(16) |
| C8C  | C9C  | C10C | 120.5(6) | O4W              | Tb1  | N1A              | 115.53(15) |
| C5A  | C10A | C9A  | 118.4(5) | O4W              | Tb1  | N1B <sup>1</sup> | 131.43(15) |
| N1A  | C10A | C5A  | 124.1(5) | O1C              | Tb2  | N1C              | 65.67(15)  |
| N1A  | C10A | C9A  | 117.5(5) | O1C              | Tb2  | O1W              | 75.39(17)  |
| C9B  | C10B | C5B  | 118.0(5) | O1C              | Tb2  | O2B              | 146.69(17) |

|      |      |      |          |                  |     |                  |            |
|------|------|------|----------|------------------|-----|------------------|------------|
| N1B  | C10B | C5B  | 123.2(5) | O1C              | Tb2 | O2W              | 72.69(18)  |
| N1B  | C10B | C9B  | 118.8(5) | O1C              | Tb2 | O3C <sup>5</sup> | 136.52(16) |
| C9C  | C10C | C5C  | 119.0(5) | O1C              | Tb2 | O3W              | 77.79(18)  |
| N1C  | C10C | C5C  | 122.2(5) | O1C              | Tb2 | O4C <sup>4</sup> | 104.26(17) |
| N1C  | C10C | C9C  | 118.8(5) | O1W              | Tb2 | N1C              | 72.74(15)  |
| O1A  | C11A | C2A  | 116.3(5) | O1W              | Tb2 | O2W              | 136.1(2)   |
| O2A  | C11A | C2A  | 119.3(5) | O1W              | Tb2 | O3W              | 69.73(19)  |
| O2A  | C11A | O1A  | 124.4(6) | O2B              | Tb2 | N1C              | 91.71(15)  |
| O1B  | C11B | C2B  | 117.3(5) | O2B              | Tb2 | O1W              | 74.59(16)  |
| O1B  | C11B | O2B  | 124.3(5) | O2B              | Tb2 | O2W              | 140.49(18) |
| O2B  | C11B | C2B  | 118.4(5) | O2B              | Tb2 | O3W              | 104.70(19) |
| O1C  | C11C | C2C  | 115.2(5) | O2W              | Tb2 | N1C              | 118.24(18) |
| O2C  | C11C | C2C  | 119.3(5) | O2W              | Tb2 | O3W              | 74.6(2)    |
| O2C  | C11C | O1C  | 125.5(6) | O3C <sup>5</sup> | Tb2 | N1C              | 154.18(15) |
| O3A  | C12A | C4A  | 115.2(5) | O3C <sup>5</sup> | Tb2 | O1W              | 120.46(16) |
| O3A  | C12A | O4A  | 126.8(5) | O3C <sup>5</sup> | Tb2 | O2B              | 72.83(17)  |
| O4A  | C12A | C4A  | 118.0(5) | O3C <sup>5</sup> | Tb2 | O2W              | 69.43(18)  |
| O3B  | C12B | C4B  | 118.9(5) | O3C <sup>5</sup> | Tb2 | O3W              | 72.31(17)  |
| O3B  | C12B | O4B  | 126.5(5) | O3W              | Tb2 | N1C              | 132.75(16) |
| O4B  | C12B | C4B  | 114.6(5) | O4C <sup>4</sup> | Tb2 | N1C              | 71.66(15)  |
| O3C  | C12C | C4C  | 116.5(5) | O4C <sup>4</sup> | Tb2 | O1W              | 140.60(17) |
| O3C  | C12C | O4C  | 125.3(6) | O4C <sup>4</sup> | Tb2 | O2B              | 90.10(16)  |
| O4C  | C12C | C4C  | 118.1(6) | O4C <sup>4</sup> | Tb2 | O2W              | 77.1(2)    |
| C2A  | N1A  | C10A | 116.9(5) | O4C <sup>4</sup> | Tb2 | O3C <sup>5</sup> | 87.46(15)  |
| C2A  | N1A  | Tb1  | 109.4(4) | O4C <sup>4</sup> | Tb2 | O3W              | 149.57(19) |
| C10A | N1A  | Tb1  | 132.7(4) |                  |     |                  |            |

Symmetry codes: <sup>1</sup>2-x,1-y,1-z; <sup>2</sup>-1+x,y,z; <sup>3</sup>1-x,-y,1-z; <sup>4</sup>1-x,1-y,2-z; <sup>5</sup>1+x,y,z.

**Table S11.** Bond Angles for (13) [Er<sub>2</sub>(Qdca)<sub>3</sub>(H<sub>2</sub>O)<sub>4</sub>]·4H<sub>2</sub>O.

| Atom             | Atom | Atom             | Angle/°    | Atom | Atom | Atom | Angle/°  |
|------------------|------|------------------|------------|------|------|------|----------|
| O1A              | Er1  | N1B <sup>1</sup> | 79.49(10)  | C3C  | C4C  | C5C  | 118.7(3) |
| O1A              | Er1  | O1B <sup>1</sup> | 84.74(10)  | C3C  | C4C  | C12C | 119.4(3) |
| O1A              | Er1  | O1W              | 78.90(11)  | C5C  | C4C  | C12C | 121.9(3) |
| O1A              | Er1  | O3A <sup>2</sup> | 149.85(11) | C4A  | C5A  | C6A  | 124.3(4) |
| O1A              | Er1  | O4A <sup>3</sup> | 97.06(10)  | C4A  | C5A  | C10A | 117.4(3) |
| O1A              | Er1  | O4B              | 132.48(11) | C6A  | C5A  | C10A | 118.3(4) |
| O1B <sup>1</sup> | Er1  | N1B <sup>1</sup> | 62.89(9)   | C4B  | C5B  | C6B  | 123.8(4) |
| O1B <sup>1</sup> | Er1  | O1W              | 75.20(10)  | C10B | C5B  | C4B  | 118.0(3) |
| O1W              | Er1  | N1B <sup>1</sup> | 134.12(10) | C10B | C5B  | C6B  | 118.2(3) |
| O3A <sup>2</sup> | Er1  | N1B <sup>1</sup> | 110.04(10) | C6C  | C5C  | C4C  | 122.4(3) |
| O3A <sup>2</sup> | Er1  | O1B <sup>1</sup> | 75.45(10)  | C10C | C5C  | C4C  | 118.2(3) |
| O3A <sup>2</sup> | Er1  | O1W              | 74.24(11)  | C10C | C5C  | C6C  | 119.4(4) |
| O4A <sup>3</sup> | Er1  | N1B <sup>1</sup> | 149.43(10) | C7A  | C6A  | C5A  | 120.7(4) |
| O4A <sup>3</sup> | Er1  | O1B <sup>1</sup> | 147.54(10) | C7B  | C6B  | C5B  | 121.0(4) |
| O4A <sup>3</sup> | Er1  | O1W              | 73.39(11)  | C7C  | C6C  | C5C  | 120.8(4) |
| O4A <sup>3</sup> | Er1  | O3A <sup>2</sup> | 88.26(10)  | C6A  | C7A  | C8A  | 120.8(4) |
| O4B              | Er1  | N1B <sup>1</sup> | 71.41(10)  | C6B  | C7B  | C8B  | 120.9(4) |
| O4B              | Er1  | O1B <sup>1</sup> | 112.43(10) | C6C  | C7C  | C8C  | 119.7(4) |
| O4B              | Er1  | O1W              | 146.99(11) | C9A  | C8A  | C7A  | 120.3(4) |
| O4B              | Er1  | O3A <sup>2</sup> | 76.87(11)  | C9B  | C8B  | C7B  | 120.0(4) |
| O4B              | Er1  | O4A <sup>3</sup> | 90.21(10)  | C9C  | C8C  | C7C  | 120.7(4) |
| O1C              | Er2  | N1C              | 65.66(10)  | C8A  | C9A  | C10A | 120.5(4) |
| O1C              | Er2  | O2B              | 153.87(11) | C8B  | C9B  | C10B | 121.1(4) |
| O1C              | Er2  | O2W              | 70.43(11)  | C8C  | C9C  | C10C | 120.7(4) |

|                  |     |                  |            |      |      |                  |          |
|------------------|-----|------------------|------------|------|------|------------------|----------|
| O1C              | Er2 | O3C <sup>4</sup> | 110.82(11) | C9A  | C10A | C5A              | 119.4(4) |
| O1C              | Er2 | O3W              | 79.41(13)  | N1A  | C10A | C5A              | 122.7(3) |
| O1C              | Er2 | O4C <sup>2</sup> | 133.94(10) | N1A  | C10A | C9A              | 117.9(4) |
| O1C              | Er2 | O4W              | 75.63(11)  | C9B  | C10B | C5B              | 118.8(3) |
| O2B              | Er2 | N1C              | 95.63(10)  | N1B  | C10B | C5B              | 122.6(3) |
| O2B              | Er2 | O2W              | 135.14(10) | N1B  | C10B | C9B              | 118.6(3) |
| O2B              | Er2 | O4C <sup>2</sup> | 69.34(10)  | C5C  | C10C | C9C              | 118.6(4) |
| O2W              | Er2 | N1C              | 108.69(10) | N1C  | C10C | C5C              | 122.2(3) |
| O3C <sup>4</sup> | Er2 | N1C              | 73.62(9)   | N1C  | C10C | C9C              | 119.2(3) |
| O3C <sup>4</sup> | Er2 | O2B              | 78.58(10)  | O1A  | C11A | C2A              | 116.4(3) |
| O3C <sup>4</sup> | Er2 | O2W              | 73.27(11)  | O2A  | C11A | C2A              | 119.4(3) |
| O3C <sup>4</sup> | Er2 | O3W              | 134.52(12) | O2A  | C11A | O1A              | 124.1(4) |
| O3C <sup>4</sup> | Er2 | O4C <sup>2</sup> | 85.54(10)  | O1B  | C11B | C2B              | 117.3(3) |
| O3W              | Er2 | N1C              | 71.18(11)  | O1B  | C11B | O2B              | 124.6(3) |
| O3W              | Er2 | O2B              | 77.19(12)  | O2B  | C11B | C2B              | 118.2(3) |
| O3W              | Er2 | O2W              | 145.84(13) | O1C  | C11C | C2C              | 116.4(3) |
| O3W              | Er2 | O4C <sup>2</sup> | 119.96(11) | O2C  | C11C | C2C              | 119.5(3) |
| O4C <sup>2</sup> | Er2 | N1C              | 156.59(10) | O2C  | C11C | O1C              | 124.1(4) |
| O4C <sup>2</sup> | Er2 | O2W              | 74.24(10)  | O3A  | C12A | C4A              | 115.5(3) |
| O4W              | Er2 | N1C              | 132.25(11) | O4A  | C12A | C4A              | 118.6(3) |
| O4W              | Er2 | O2B              | 109.05(11) | O4A  | C12A | O3A              | 125.8(3) |
| O4W              | Er2 | O2W              | 81.88(13)  | O3B  | C12B | C4B              | 118.7(3) |
| O4W              | Er2 | O3C <sup>4</sup> | 149.66(12) | O3B  | C12B | O4B              | 124.8(4) |
| O4W              | Er2 | O3W              | 75.30(14)  | O4B  | C12B | C4B              | 116.5(3) |
| O4W              | Er2 | O4C <sup>2</sup> | 70.92(11)  | O3C  | C12C | C4C              | 116.1(3) |
| C3A              | C2A | C11A             | 119.7(3)   | O4C  | C12C | C4C              | 118.1(3) |
| N1A              | C2A | C3A              | 123.6(4)   | O4C  | C12C | O3C              | 125.8(3) |
| N1A              | C2A | C11A             | 116.7(3)   | C2A  | N1A  | C10A             | 117.4(3) |
| C3B              | C2B | C11B             | 120.9(3)   | C2B  | N1B  | Er1 <sup>1</sup> | 113.1(2) |
| N1B              | C2B | C3B              | 124.0(3)   | C2B  | N1B  | C10B             | 117.5(3) |
| N1B              | C2B | C11B             | 115.0(3)   | C10B | N1B  | Er1 <sup>1</sup> | 127.8(2) |
| C3C              | C2C | C11C             | 119.7(3)   | C2C  | N1C  | Er2              | 113.4(2) |
| N1C              | C2C | C3C              | 123.9(4)   | C2C  | N1C  | C10C             | 117.4(3) |
| N1C              | C2C | C11C             | 116.4(3)   | C10C | N1C  | Er2              | 129.1(2) |
| C4A              | C3A | C2A              | 120.2(4)   | C11A | O1A  | Er1              | 137.6(3) |
| C4B              | C3B | C2B              | 119.2(3)   | C11B | O1B  | Er1 <sup>1</sup> | 129.9(2) |
| C4C              | C3C | C2C              | 119.6(4)   | C11C | O1C  | Er2              | 127.7(3) |
| C3A              | C4A | C5A              | 118.6(3)   | C11B | O2B  | Er2              | 122.9(2) |
| C3A              | C4A | C12A             | 116.9(3)   | C12A | O3A  | Er1 <sup>5</sup> | 145.4(2) |
| C5A              | C4A | C12A             | 124.4(3)   | C12C | O3C  | Er2 <sup>4</sup> | 139.6(3) |
| C3B              | C4B | C5B              | 118.5(3)   | C12A | O4A  | Er1 <sup>3</sup> | 168.6(3) |
| C3B              | C4B | C12B             | 121.3(3)   | C12B | O4B  | Er1              | 161.5(3) |
| C5B              | C4B | C12B             | 120.2(3)   | C12C | O4C  | Er2 <sup>5</sup> | 137.3(2) |

Symmetry codes: <sup>1</sup>-x,1-y,1-z; <sup>2</sup>-1+x,+y,+z; <sup>3</sup>1-x,-y,1-z; <sup>4</sup>1-x,1-y,2-z; <sup>5</sup>1+x,+y,+z.

**Table S12.** Torsion Angles for (1) [Nd<sub>2</sub>(Qdca)<sub>3</sub>(H<sub>2</sub>O)<sub>3</sub>].

| A   | B    | C   | D                | Angle/°   | A   | B    | C    | D                | Angle/°   |
|-----|------|-----|------------------|-----------|-----|------|------|------------------|-----------|
| C2A | C3A  | C4A | C5A              | -1.6(14)  | C5C | C10C | N1C  | Nd2 <sup>2</sup> | -177.7(5) |
| C2A | C3A  | C4A | C12A             | 178.6(9)  | C6A | C5A  | C10A | C9A              | 3.7(13)   |
| C2A | C11A | O1A | Nd1              | 25.4(9)   | C6A | C5A  | C10A | N1A              | -177.5(8) |
| C2A | C11A | O2A | Nd2 <sup>1</sup> | -172.3(6) | C6A | C7A  | C8A  | C9A              | 2.4(18)   |
| C2B | C3B  | C4B | C5B              | 1.5(9)    | C6B | C5B  | C10B | C9B              | 1.6(11)   |
| C2B | C3B  | C4B | C12B             | 177.3(6)  | C6B | C5B  | C10B | N1B              | -175.0(7) |
| C2B | C11B | O1B | Nd2 <sup>1</sup> | -92.7(13) | C6B | C7B  | C8B  | C9B              | 1.2(11)   |
| C2B | C11B | O2B | Nd1              | 158.2(5)  | C6C | C5C  | C10C | C9C              | -0.4(10)  |

|     |      |      |                  |           |      |      |      |                  |            |
|-----|------|------|------------------|-----------|------|------|------|------------------|------------|
| C2C | C3C  | C4C  | C5C              | 0.4(11)   | C6C  | C5C  | C10C | N1C              | 179.1(7)   |
| C2C | C3C  | C4C  | C12C             | 176.9(7)  | C6C  | C7C  | C8C  | C9C              | -2.4(12)   |
| C2C | C11C | O1C  | Nd2 <sup>2</sup> | -8.4(9)   | C7A  | C8A  | C9A  | C10A             | -2.3(17)   |
| C3A | C2A  | C11A | O1A              | 166.8(8)  | C7B  | C8B  | C9B  | C10B             | 0.6(12)    |
| C3A | C2A  | C11A | O2A              | -12.1(13) | C7C  | C8C  | C9C  | C10C             | 1.7(12)    |
| C3A | C2A  | N1A  | C10A             | -3.5(13)  | C8A  | C9A  | C10A | C5A              | -0.8(14)   |
| C3A | C2A  | N1A  | Nd1              | 177.3(7)  | C8A  | C9A  | C10A | N1A              | -179.6(9)  |
| C3A | C4A  | C5A  | C6A              | 177.8(9)  | C8B  | C9B  | C10B | C5B              | -2.0(12)   |
| C3A | C4A  | C5A  | C10A             | -0.8(13)  | C8B  | C9B  | C10B | N1B              | 174.8(7)   |
| C3A | C4A  | C12A | O3A              | 88.4(10)  | C8C  | C9C  | C10C | C5C              | -0.3(11)   |
| C3A | C4A  | C12A | O4A              | -93.1(10) | C8C  | C9C  | C10C | N1C              | -179.9(8)  |
| C3B | C2B  | C11B | O1B              | 174.3(6)  | C9A  | C10A | N1A  | C2A              | 179.7(9)   |
| C3B | C2B  | C11B | O2B              | -5.4(9)   | C9A  | C10A | N1A  | Nd1              | -1.2(11)   |
| C3B | C2B  | N1B  | C10B             | -1.6(9)   | C9B  | C10B | N1B  | C2B              | -176.8(6)  |
| C3B | C4B  | C5B  | C6B              | 174.2(7)  | C9C  | C10C | N1C  | C2C              | 179.1(7)   |
| C3B | C4B  | C5B  | C10B             | -3.0(10)  | C9C  | C10C | N1C  | Nd2 <sup>2</sup> | 1.9(10)    |
| C3B | C4B  | C12B | O3B              | -61.5(8)  | C10A | C5A  | C6A  | C7A              | -3.8(14)   |
| C3B | C4B  | C12B | O4B              | 120.1(7)  | C10B | C5B  | C6B  | C7B              | 0.2(11)    |
| C3C | C2C  | C11C | O1C              | -173.5(6) | C10C | C5C  | C6C  | C7C              | -0.2(11)   |
| C3C | C2C  | C11C | O2C              | 7.0(10)   | C11A | C2A  | C3A  | C4A              | -174.4(8)  |
| C3C | C2C  | N1C  | C10C             | -0.4(11)  | C11A | C2A  | N1A  | C10A             | 175.0(8)   |
| C3C | C2C  | N1C  | Nd2 <sup>2</sup> | 177.4(6)  | C11A | C2A  | N1A  | Nd1              | -4.3(10)   |
| C3C | C4C  | C5C  | C6C              | -178.9(7) | C11B | C2B  | C3B  | C4B              | -174.8(6)  |
| C3C | C4C  | C5C  | C10C             | -1.2(10)  | C11B | C2B  | N1B  | C10B             | 174.4(6)   |
| C3C | C4C  | C12C | O3C              | -152.6(8) | C11C | C2C  | C3C  | C4C              | -179.3(7)  |
| C3C | C4C  | C12C | O4C              | 24.4(10)  | C11C | C2C  | N1C  | C10C             | 179.3(6)   |
| C4A | C5A  | C6A  | C7A              | 177.6(10) | C11C | C2C  | N1C  | Nd2 <sup>2</sup> | -2.8(8)    |
| C4A | C5A  | C10A | C9A              | -177.6(9) | C12A | C4A  | C5A  | C6A              | -2.4(13)   |
| C4A | C5A  | C10A | N1A              | 1.2(13)   | C12A | C4A  | C5A  | C10A             | 179.0(9)   |
| C4A | C12A | O3A  | Nd1 <sup>3</sup> | 63.9(12)  | C12B | C4B  | C5B  | C6B              | -1.6(12)   |
| C4A | C12A | O4A  | Nd1 <sup>4</sup> | -51.0(16) | C12B | C4B  | C5B  | C10B             | -178.9(7)  |
| C4B | C5B  | C6B  | C7B              | -177.0(7) | C12C | C4C  | C5C  | C6C              | 4.8(11)    |
| C4B | C5B  | C10B | C9B              | 179.0(7)  | C12C | C4C  | C5C  | C10C             | -177.5(6)  |
| C4B | C5B  | C10B | N1B              | 2.4(10)   | N1A  | C2A  | C3A  | C4A              | 3.9(15)    |
| C4B | C12B | O3B  | Nd2              | 10.7(13)  | N1A  | C2A  | C11A | O1A              | -11.7(11)  |
| C4B | C12B | O4B  | Nd2 <sup>5</sup> | -80.4(9)  | N1A  | C2A  | C11A | O2A              | 169.4(8)   |
| C4C | C5C  | C6C  | C7C              | 177.5(7)  | N1B  | C2B  | C3B  | C4B              | 0.9(9)     |
| C4C | C5C  | C10C | C9C              | -178.3(7) | N1B  | C2B  | C11B | O1B              | -1.7(9)    |
| C4C | C5C  | C10C | N1C              | 1.3(10)   | N1B  | C2B  | C11B | O2B              | 178.7(6)   |
| C4C | C12C | O3C  | Nd1              | 177.8(6)  | N1C  | C2C  | C3C  | C4C              | 0.5(12)    |
| C4C | C12C | O4C  | Nd1              | -177.8(6) | N1C  | C2C  | C11C | O1C              | 6.7(9)     |
| C5A | C4A  | C12A | O3A              | -91.4(9)  | N1C  | C2C  | C11C | O2C              | -172.8(6)  |
| C5A | C4A  | C12A | O4A              | 87.1(9)   | O1A  | C11A | O2A  | Nd2 <sup>1</sup> | 9.0(10)    |
| C5A | C6A  | C7A  | C8A              | 0.8(16)   | O1B  | C11B | O2B  | Nd1              | -21.4(12)  |
| C5A | C10A | N1A  | C2A              | 0.9(13)   | O2A  | C11A | O1A  | Nd1              | -155.8(6)  |
| C5A | C10A | N1A  | Nd1              | -180.0(6) | O2B  | C11B | O1B  | Nd2 <sup>1</sup> | 86.9(13)   |
| C5B | C4B  | C12B | O3B              | 114.3(7)  | O2C  | C11C | O1C  | Nd2 <sup>2</sup> | 171.1(5)   |
| C5B | C4B  | C12B | O4B              | -64.1(8)  | O3A  | C12A | O4A  | Nd1 <sup>4</sup> | 127.3(13)  |
| C5B | C6B  | C7B  | C8B              | -1.6(11)  | O3B  | C12B | O4B  | Nd2 <sup>5</sup> | 101.4(9)   |
| C5B | C10B | N1B  | C2B              | -0.1(10)  | O3C  | C12C | O4C  | Nd1              | -1.0(9)    |
| C5C | C4C  | C12C | O3C              | 23.8(12)  | O4A  | C12A | O3A  | Nd1 <sup>3</sup> | -114.5(11) |
| C5C | C4C  | C12C | O4C              | -159.3(7) | O4B  | C12B | O3B  | Nd2              | -171.1(8)  |
| C5C | C6C  | C7C  | C8C              | 1.6(12)   | O4C  | C12C | O3C  | Nd1              | 1.0(9)     |
| C5C | C10C | N1C  | C2C              | -0.4(10)  |      |      |      |                  |            |

Symmetry codes: <sup>1</sup>1/2+x,3/2-y,+z; <sup>2</sup>1/2+x,3/2-y,+z; <sup>3</sup>1-x,1-y,-1/2+z; <sup>4</sup>1-x,1-y,1/2+z; <sup>5</sup>+x,+y,-1+z.

**Table S13.** Torsion Angles for (4) [Nd<sub>2</sub>(Qdca)<sub>3</sub>(H<sub>2</sub>O)<sub>4</sub>].3H<sub>2</sub>O.

| A                | B    | C    | D    | Angle/°    | A    | B    | C    | D    | Angle/°   |
|------------------|------|------|------|------------|------|------|------|------|-----------|
| Nd1 <sup>1</sup> | O1A  | C11A | O2A  | 145.0(5)   | C3B  | C2B  | C11B | O1B  | 171.2(6)  |
| Nd1 <sup>1</sup> | O1A  | C11A | C2A  | -35.2(8)   | C3B  | C2B  | C11B | O2B  | -7.0(10)  |
| Nd1              | O4A  | C12A | O3A  | 83.0(15)   | C4A  | C5A  | C6A  | C7A  | 178.7(7)  |
| Nd1              | O4A  | C12A | C4A  | -91.4(14)  | C4A  | C3A  | C2A  | N1A  | -3.9(10)  |
| Nd1 <sup>2</sup> | O2A  | C11A | O1A  | -34.7(10)  | C4A  | C3A  | C2A  | C11A | 172.3(6)  |
| Nd1 <sup>2</sup> | O2A  | C11A | C2A  | 145.5(5)   | C5A  | C10A | C9A  | C8A  | -0.3(11)  |
| Nd1 <sup>3</sup> | O2B  | C11B | O1B  | 92.3(10)   | C5A  | C4A  | C3A  | C2A  | 6.5(10)   |
| Nd1 <sup>3</sup> | O2B  | C11B | C2B  | -89.7(9)   | C5A  | C4A  | C12A | O4A  | -32.9(10) |
| Nd1              | O4B  | C12B | O3B  | -153.0(12) | C5A  | C4A  | C12A | O3A  | 152.4(7)  |
| Nd1              | O4B  | C12B | C4B  | 28(2)      | C5A  | C6A  | C7A  | C8A  | 0.4(12)   |
| Nd1 <sup>1</sup> | N1A  | C10A | C5A  | -169.0(5)  | C2B  | N1B  | C10B | C5B  | -3.0(9)   |
| Nd1 <sup>1</sup> | N1A  | C10A | C9A  | 8.1(9)     | C2B  | N1B  | C10B | C9B  | 177.1(6)  |
| Nd1 <sup>1</sup> | N1A  | C2A  | C3A  | 172.7(5)   | C5C  | C6C  | C7C  | C8C  | -0.7(13)  |
| Nd1 <sup>1</sup> | N1A  | C2A  | C11A | -3.7(7)    | C5C  | C10C | C9C  | C8C  | 0.2(11)   |
| Nd2 <sup>4</sup> | O1B  | C11B | O2B  | -179.3(5)  | C5C  | C4C  | C3C  | C2C  | -4.8(10)  |
| Nd2 <sup>4</sup> | O1B  | C11B | C2B  | 2.7(9)     | C5C  | C4C  | C12C | O4C  | 59.5(10)  |
| Nd2 <sup>5</sup> | O1C  | C11C | O2C  | -155.3(6)  | C5C  | C4C  | C12C | O3C  | -120.3(9) |
| Nd2 <sup>5</sup> | O1C  | C11C | C2C  | 24.5(9)    | C3A  | C4A  | C5A  | C10A | -3.8(9)   |
| Nd2 <sup>4</sup> | N1B  | C10B | C5B  | 166.2(5)   | C3A  | C4A  | C5A  | C6A  | 176.5(7)  |
| Nd2 <sup>4</sup> | N1B  | C10B | C9B  | -13.7(8)   | C3A  | C4A  | C12A | O4A  | 142.7(7)  |
| Nd2 <sup>4</sup> | N1B  | C2B  | C3B  | -170.3(5)  | C3A  | C4A  | C12A | O3A  | -32.0(10) |
| Nd2 <sup>4</sup> | N1B  | C2B  | C11B | 9.7(7)     | C3A  | C2A  | C11A | O1A  | -154.2(6) |
| Nd2 <sup>5</sup> | N1C  | C10C | C5C  | 156.1(5)   | C3A  | C2A  | C11A | O2A  | 25.6(9)   |
| Nd2 <sup>5</sup> | N1C  | C10C | C9C  | -24.0(9)   | C12B | C4B  | C3B  | C2B  | 177.3(6)  |
| Nd2 <sup>5</sup> | N1C  | C2C  | C3C  | -162.4(5)  | C2A  | N1A  | C10A | C5A  | 4.3(9)    |
| Nd2 <sup>5</sup> | N1C  | C2C  | C11C | 15.5(7)    | C2A  | N1A  | C10A | C9A  | -178.5(6) |
| N1A              | C10A | C5A  | C4A  | -1.7(10)   | C9B  | C8B  | C7B  | C6B  | 0.0(12)   |
| N1A              | C10A | C5A  | C6A  | 178.1(6)   | C6B  | C5B  | C10B | N1B  | -178.5(6) |
| N1A              | C10A | C9A  | C8A  | -177.5(7)  | C6B  | C5B  | C10B | C9B  | 1.5(9)    |
| N1A              | C2A  | C11A | O1A  | 22.3(8)    | C6B  | C5B  | C4B  | C3B  | -179.1(6) |
| N1A              | C2A  | C11A | O2A  | -157.9(6)  | C6B  | C5B  | C4B  | C12B | 2.2(10)   |
| N1B              | C10B | C9B  | C8B  | 178.7(7)   | C6C  | C5C  | C10C | N1C  | -178.7(6) |
| N1B              | C2B  | C11B | O1B  | -8.8(9)    | C6C  | C5C  | C10C | C9C  | 1.4(10)   |
| N1B              | C2B  | C11B | O2B  | 173.0(6)   | C6C  | C5C  | C4C  | C3C  | -176.2(7) |
| N1C              | C10C | C9C  | C8C  | -179.7(7)  | C6C  | C5C  | C4C  | C12C | 0.7(11)   |
| N1C              | C2C  | C3C  | C4C  | 3.4(11)    | C12A | C4A  | C5A  | C10A | 171.8(6)  |
| N1C              | C2C  | C11C | O1C  | -26.6(9)   | C12A | C4A  | C5A  | C6A  | -7.9(11)  |
| N1C              | C2C  | C11C | O2C  | 153.3(7)   | C12A | C4A  | C3A  | C2A  | -169.4(6) |
| C5B              | C10B | C9B  | C8B  | -1.2(10)   | C9A  | C10A | C5A  | C4A  | -178.8(6) |
| C5B              | C4B  | C3B  | C2B  | -1.5(10)   | C9A  | C10A | C5A  | C6A  | 1.0(10)   |
| C5B              | C4B  | C12B | O3B  | 60.6(9)    | C10C | N1C  | C2C  | C3C  | 1.6(10)   |
| C5B              | C4B  | C12B | O4B  | -120.0(7)  | C10C | N1C  | C2C  | C11C | 179.5(6)  |
| C5B              | C6B  | C7B  | C8B  | 0.3(12)    | C10C | C5C  | C6C  | C7C  | -1.1(11)  |
| C10B             | N1B  | C2B  | C3B  | 0.4(9)     | C10C | C5C  | C4C  | C3C  | 1.5(10)   |
| C10B             | N1B  | C2B  | C11B | -179.6(6)  | C10C | C5C  | C4C  | C12C | 178.3(7)  |
| C10B             | C5B  | C4B  | C3B  | -1.0(9)    | C10C | C9C  | C8C  | C7C  | -2.0(13)  |
| C10B             | C5B  | C4B  | C12B | -179.8(6)  | C2C  | N1C  | C10C | C5C  | -5.0(10)  |
| C10B             | C5B  | C6B  | C7B  | -1.0(10)   | C2C  | N1C  | C10C | C9C  | 174.9(7)  |
| C10B             | C9B  | C8B  | C7B  | 0.5(12)    | C4C  | C5C  | C6C  | C7C  | 176.5(7)  |
| C4B              | C5B  | C10B | N1B  | 3.4(9)     | C4C  | C5C  | C10C | N1C  | 3.5(10)   |
| C4B              | C5B  | C10B | C9B  | -176.7(6)  | C4C  | C5C  | C10C | C9C  | -176.4(7) |
| C4B              | C5B  | C6B  | C7B  | 177.0(7)   | C9C  | C8C  | C7C  | C6C  | 2.2(13)   |

|      |     |      |      |           |      |     |      |     |           |
|------|-----|------|------|-----------|------|-----|------|-----|-----------|
| C4B  | C3B | C2B  | N1B  | 1.9(10)   | C3C  | C2C | C11C | O1C | 151.4(7)  |
| C4B  | C3B | C2B  | C11B | -178.1(6) | C3C  | C2C | C11C | O2C | -28.7(10) |
| C10A | N1A | C2A  | C3A  | -1.6(10)  | C3C  | C4C | C12C | O4C | -123.6(8) |
| C10A | N1A | C2A  | C11A | -178.0(5) | C3C  | C4C | C12C | O3C | 56.6(11)  |
| C10A | C5A | C6A  | C7A  | -1.1(11)  | C6A  | C7A | C8A  | C9A | 0.3(12)   |
| C10A | C9A | C8A  | C7A  | -0.4(12)  | C11C | C2C | C3C  | C4C | -174.4(7) |
| C3B  | C4B | C12B | O3B  | -118.2(7) | C12C | C4C | C3C  | C2C | 178.1(6)  |
| C3B  | C4B | C12B | O4B  | 61.2(9)   |      |     |      |     |           |

Symmetry codes: <sup>1</sup>2-x,2-y,1-z; <sup>2</sup>1+x,y,z; <sup>3</sup>1-x,1-y,1-z; <sup>4</sup>1-x,2-y,1-z; <sup>5</sup>-x,1-y,-z.

**Table S14.** Torsion Angles for (8) [Eu<sub>2</sub>(Qdca)<sub>3</sub>(H<sub>2</sub>O)<sub>4</sub>]·H<sub>2</sub>O.

| A   | B    | C    | D                | Angle/°    | A    | B    | C    | D                | Angle/°   |
|-----|------|------|------------------|------------|------|------|------|------------------|-----------|
| C2A | C3A  | C4A  | C5A              | 1.9(8)     | C5C  | C10C | N1C  | C2C              | -4.0(8)   |
| C2A | C3A  | C4A  | C12A             | -173.5(5)  | C6A  | C5A  | C10A | C9A              | 2.6(8)    |
| C2A | C11A | O1A  | Eu1              | 4.5(8)     | C6A  | C5A  | C10A | N1A              | -178.7(5) |
| C2B | C3B  | C4B  | C5B              | 3.3(8)     | C6A  | C7A  | C8A  | C9A              | 1.3(10)   |
| C2B | C3B  | C4B  | C12B             | -175.5(5)  | C6B  | C5B  | C10B | C9B              | -0.5(8)   |
| C2B | C11B | O1B  | Eu1 <sup>1</sup> | -1.8(8)    | C6B  | C5B  | C10B | N1B              | -180.0(5) |
| C2B | C11B | O2B  | Eu2              | 154.6(4)   | C6B  | C7B  | C8B  | C9B              | 1.1(11)   |
| C2C | C3C  | C4C  | C5C              | -5.6(8)    | C6C  | C5C  | C10C | C9C              | -0.3(8)   |
| C2C | C3C  | C4C  | C12C             | 171.2(5)   | C6C  | C5C  | C10C | N1C              | -179.1(5) |
| C2C | C11C | O1C  | Eu2              | 16.7(8)    | C6C  | C7C  | C8C  | C9C              | -1.5(11)  |
| C3A | C2A  | C11A | O1A              | -172.0(5)  | C7A  | C8A  | C9A  | C10A             | -0.5(10)  |
| C3A | C2A  | C11A | O2A              | 5.5(9)     | C7B  | C8B  | C9B  | C10B             | 0.5(10)   |
| C3A | C2A  | N1A  | Eu1              | 167.7(4)   | C7C  | C8C  | C9C  | C10C             | 2.6(10)   |
| C3A | C2A  | N1A  | C10A             | -2.4(8)    | C8A  | C9A  | C10A | C5A              | -1.5(9)   |
| C3A | C4A  | C5A  | C6A              | 177.3(5)   | C8A  | C9A  | C10A | N1A              | 179.7(6)  |
| C3A | C4A  | C5A  | C10A             | -2.9(8)    | C8B  | C9B  | C10B | C5B              | -0.7(9)   |
| C3A | C4A  | C12A | O3A              | -32.1(7)   | C8B  | C9B  | C10B | N1B              | 178.8(6)  |
| C3A | C4A  | C12A | O4A              | 145.6(5)   | C8C  | C9C  | C10C | C5C              | -1.7(9)   |
| C3B | C2B  | C11B | O1B              | -171.0(5)  | C8C  | C9C  | C10C | N1C              | 177.0(6)  |
| C3B | C2B  | C11B | O2B              | 10.2(8)    | C9A  | C10A | N1A  | Eu1              | 12.4(7)   |
| C3B | C2B  | N1B  | Eu1 <sup>1</sup> | 169.6(4)   | C9A  | C10A | N1A  | C2A              | 179.9(5)  |
| C3B | C2B  | N1B  | C10B             | -3.0(8)    | C9B  | C10B | N1B  | Eu1 <sup>1</sup> | 12.3(8)   |
| C3B | C4B  | C5B  | C6B              | 176.8(6)   | C9B  | C10B | N1B  | C2B              | -176.5(5) |
| C3B | C4B  | C5B  | C10B             | -3.2(8)    | C9C  | C10C | N1C  | Eu2              | -13.3(8)  |
| C3B | C4B  | C12B | O3B              | -58.7(8)   | C9C  | C10C | N1C  | C2C              | 177.2(5)  |
| C3B | C4B  | C12B | O4B              | 120.7(6)   | C10A | C5A  | C6A  | C7A              | -1.7(9)   |
| C3C | C2C  | C11C | Eu2              | 171.4(5)   | C10B | C5B  | C6B  | C7B              | 2.0(9)    |
| C3C | C2C  | C11C | O1C              | 162.1(5)   | C10C | C5C  | C6C  | C7C              | 1.5(9)    |
| C3C | C2C  | C11C | O2C              | -17.2(8)   | C11A | C2A  | C3A  | C4A              | 178.5(5)  |
| C3C | C2C  | N1C  | Eu2              | -169.1(4)  | C11A | C2A  | N1A  | Eu1              | -9.9(6)   |
| C3C | C2C  | N1C  | C10C             | 2.3(8)     | C11A | C2A  | N1A  | C10A             | 179.9(5)  |
| C3C | C4C  | C5C  | C6C              | -176.1(6)  | C11B | C2B  | C3B  | C4B              | 179.6(5)  |
| C3C | C4C  | C5C  | C10C             | 3.8(8)     | C11B | C2B  | N1B  | Eu1 <sup>1</sup> | -10.3(6)  |
| C3C | C4C  | C12C | O3C              | 37.7(8)    | C11B | C2B  | N1B  | C10B             | 177.2(5)  |
| C3C | C4C  | C12C | O4C              | -139.2(6)  | C11C | C2C  | C3C  | C4C              | -176.9(5) |
| C4A | C5A  | C6A  | C7A              | 178.1(6)   | C11C | C2C  | N1C  | Eu2              | 10.4(6)   |
| C4A | C5A  | C10A | C9A              | -177.3(5)  | C11C | C2C  | N1C  | C10C             | -178.2(5) |
| C4A | C5A  | C10A | N1A              | 1.4(8)     | C12A | C4A  | C5A  | C6A              | -7.8(9)   |
| C4A | C12A | O3A  | Eu1 <sup>2</sup> | -151.0(4)  | C12A | C4A  | C5A  | C10A             | 172.0(5)  |
| C4A | C12A | O4A  | Eu1 <sup>3</sup> | -103.2(10) | C12B | C4B  | C5B  | C6B              | -4.4(9)   |
| C4B | C5B  | C6B  | C7B              | -178.0(6)  | C12B | C4B  | C5B  | C10B             | 175.6(5)  |
| C4B | C5B  | C10B | C9B              | 179.6(5)   | C12C | C4C  | C5C  | C6C              | 7.3(9)    |

|     |      |      |                  |           |      |      |      |                  |           |
|-----|------|------|------------------|-----------|------|------|------|------------------|-----------|
| C4B | C5B  | C10B | N1B              | 0.1(8)    | C12C | C4C  | C5C  | C10C             | -172.8(5) |
| C4C | C5C  | C6C  | C7C              | -178.6(6) | N1A  | C2A  | C3A  | C4A              | 0.9(9)    |
| C4C | C5C  | C10C | C9C              | 179.8(5)  | N1A  | C2A  | C11A | O1A              | 5.7(8)    |
| C4C | C5C  | C10C | N1C              | 1.0(8)    | N1A  | C2A  | C11A | O2A              | -176.7(6) |
| C4C | C12C | O3C  | Eu2 <sup>2</sup> | 156.5(5)  | N1B  | C2B  | C3B  | C4B              | -0.2(9)   |
| C4C | C12C | O4C  | Eu2 <sup>4</sup> | 83.8(18)  | N1B  | C2B  | C11B | O1B              | 8.8(8)    |
| C5A | C4A  | C12A | O3A              | 152.8(5)  | N1B  | C2B  | C11B | O2B              | -169.9(5) |
| C5A | C4A  | C12A | O4A              | -29.4(8)  | N1C  | C2C  | C3C  | C4C              | 2.6(9)    |
| C5A | C6A  | C7A  | C8A              | -0.2(10)  | N1C  | C2C  | C11C | Eu2              | -8.2(5)   |
| C5A | C10A | N1A  | Eu1              | -166.3(4) | N1C  | C2C  | C11C | O1C              | -17.5(8)  |
| C5A | C10A | N1A  | C2A              | 1.2(8)    | N1C  | C2C  | C11C | O2C              | 163.2(6)  |
| C5B | C4B  | C12B | O3B              | 122.5(6)  | O1B  | C11B | O2B  | Eu2              | -24.1(8)  |
| C5B | C4B  | C12B | O4B              | -58.0(7)  | O2A  | C11A | O1A  | Eu1              | -173.0(5) |
| C5B | C6B  | C7B  | C8B              | -2.3(10)  | O2B  | C11B | O1B  | Eu1 <sup>1</sup> | 176.9(4)  |
| C5B | C10B | N1B  | Eu1 <sup>1</sup> | -168.2(4) | O2C  | C11C | O1C  | Eu2              | -164.1(5) |
| C5B | C10B | N1B  | C2B              | 3.0(8)    | O3A  | C12A | O4A  | Eu1 <sup>3</sup> | 74.2(11)  |
| C5C | C4C  | C12C | O3C              | -145.6(6) | O3C  | C12C | O4C  | Eu2 <sup>4</sup> | -92.8(17) |
| C5C | C4C  | C12C | O4C              | 37.5(8)   | O4A  | C12A | O3A  | Eu1 <sup>2</sup> | 31.5(10)  |
| C5C | C6C  | C7C  | C8C              | -0.7(10)  | O4C  | C12C | O3C  | Eu2 <sup>2</sup> | -26.8(11) |
| C5C | C10C | N1C  | Eu2              | 165.4(4)  |      |      |      |                  |           |

Symmetry codes: <sup>1</sup>2-x,1-y,1-z; <sup>2</sup>-1+x,y,z; <sup>3</sup>1-x,-y,1-z; <sup>4</sup>1-x,1-y,2-z.

**Table S15.** Torsion Angles for (9) [Tb<sub>2</sub>(Qdca)<sub>3</sub>(H<sub>2</sub>O)<sub>4</sub>]·H<sub>2</sub>O.

| A   | B    | C    | D                | Angle/°   | A    | B    | C    | D                | Angle/°   |
|-----|------|------|------------------|-----------|------|------|------|------------------|-----------|
| C2A | C3A  | C4A  | C5A              | 3.2(8)    | C5C  | C10C | N1C  | Tb2              | 164.3(4)  |
| C2A | C3A  | C4A  | C12A             | -172.3(5) | C6A  | C5A  | C10A | C9A              | 3.0(8)    |
| C2A | C11A | O1A  | Tb1              | 2.5(8)    | C6A  | C5A  | C10A | N1A              | -178.8(5) |
| C2B | C3B  | C4B  | C5B              | 3.6(8)    | C6A  | C7A  | C8A  | C9A              | 3.1(10)   |
| C2B | C3B  | C4B  | C12B             | -175.6(5) | C6B  | C5B  | C10B | C9B              | 0.1(9)    |
| C2B | C11B | O1B  | Tb1 <sup>1</sup> | -2.6(8)   | C6B  | C5B  | C10B | N1B              | -179.9(5) |
| C2B | C11B | O2B  | Tb2              | 153.8(4)  | C6B  | C7B  | C8B  | C9B              | 0.4(12)   |
| C2C | C3C  | C4C  | C5C              | -5.4(9)   | C6C  | C5C  | C10C | C9C              | -1.3(8)   |
| C2C | C3C  | C4C  | C12C             | 171.2(5)  | C6C  | C5C  | C10C | N1C              | -179.0(5) |
| C2C | C11C | O1C  | Tb2              | 17.8(8)   | C6C  | C7C  | C8C  | C9C              | 0.0(11)   |
| C3A | C2A  | C11A | O1A              | -171.6(5) | C7A  | C8A  | C9A  | C10A             | -1.9(10)  |
| C3A | C2A  | C11A | O2A              | 5.7(9)    | C7B  | C8B  | C9B  | C10B             | 0.6(11)   |
| C3A | C2A  | N1A  | C10A             | -1.3(8)   | C7C  | C8C  | C9C  | C10C             | 1.8(11)   |
| C3A | C2A  | N1A  | Tb1              | 168.4(4)  | C8A  | C9A  | C10A | C5A              | -1.1(9)   |
| C3A | C4A  | C5A  | C6A              | 176.9(6)  | C8A  | C9A  | C10A | N1A              | -179.3(6) |
| C3A | C4A  | C5A  | C10A             | -3.5(8)   | C8B  | C9B  | C10B | C5B              | -0.9(10)  |
| C3A | C4A  | C12A | O3A              | -32.3(7)  | C8B  | C9B  | C10B | N1B              | 179.2(6)  |
| C3A | C4A  | C12A | O4A              | 146.3(6)  | C8C  | C9C  | C10C | C5C              | -1.1(9)   |
| C3B | C2B  | C11B | O1B              | -170.3(5) | C8C  | C9C  | C10C | N1C              | 176.7(6)  |
| C3B | C2B  | C11B | O2B              | 10.3(8)   | C9A  | C10A | N1A  | C2A              | 179.0(5)  |
| C3B | C2B  | N1B  | C10B             | -3.7(8)   | C9A  | C10A | N1A  | Tb1              | 12.2(7)   |
| C3B | C2B  | N1B  | Tb1 <sup>1</sup> | 169.3(5)  | C9B  | C10B | N1B  | C2B              | -176.4(6) |
| C3B | C4B  | C5B  | C6B              | 176.3(6)  | C9B  | C10B | N1B  | Tb1 <sup>1</sup> | 11.9(8)   |
| C3B | C4B  | C5B  | C10B             | -3.5(8)   | C9C  | C10C | N1C  | C2C              | 177.5(5)  |
| C3B | C4B  | C12B | O3B              | -59.3(8)  | C9C  | C10C | N1C  | Tb2              | -13.4(8)  |
| C3B | C4B  | C12B | O4B              | 119.6(6)  | C10A | C5A  | C6A  | C7A              | -2.0(9)   |
| C3C | C2C  | C11C | O1C              | 161.2(6)  | C10B | C5B  | C6B  | C7B              | 0.9(9)    |
| C3C | C2C  | C11C | O2C              | -18.2(9)  | C10C | C5C  | C6C  | C7C              | 3.1(9)    |
| C3C | C2C  | N1C  | C10C             | 2.4(8)    | C11A | C2A  | C3A  | C4A              | 177.4(5)  |
| C3C | C2C  | N1C  | Tb2              | -168.7(5) | C11A | C2A  | N1A  | C10A             | -179.5(5) |



|     |      |      |                  |            |      |      |      |                  |           |
|-----|------|------|------------------|------------|------|------|------|------------------|-----------|
| C3C | C4C  | C5C  | C6C              | -175.7(6)  | C11A | C2A  | N1A  | Tb1              | -9.8(6)   |
| C3C | C4C  | C5C  | C10C             | 3.0(8)     | C11B | C2B  | C3B  | C4B              | 179.3(5)  |
| C3C | C4C  | C12C | O3C              | 37.8(8)    | C11B | C2B  | N1B  | C10B             | 177.1(5)  |
| C3C | C4C  | C12C | O4C              | -139.1(6)  | C11B | C2B  | N1B  | Tb1 <sup>1</sup> | -9.9(6)   |
| C4A | C5A  | C6A  | C7A              | 177.6(6)   | C11C | C2C  | C3C  | C4C              | -176.8(6) |
| C4A | C5A  | C10A | C9A              | -176.6(5)  | C11C | C2C  | N1C  | C10C             | -178.1(5) |
| C4A | C5A  | C10A | N1A              | 1.6(8)     | C11C | C2C  | N1C  | Tb2              | 10.8(6)   |
| C4A | C12A | O3A  | Tb1 <sup>2</sup> | -151.4(4)  | C12A | C4A  | C5A  | C6A              | -8.0(9)   |
| C4A | C12A | O4A  | Tb1 <sup>3</sup> | -102.8(10) | C12A | C4A  | C5A  | C10A             | 171.6(5)  |
| C4B | C5B  | C6B  | C7B              | -178.9(7)  | C12B | C4B  | C5B  | C6B              | -4.6(9)   |
| C4B | C5B  | C10B | C9B              | 179.9(6)   | C12B | C4B  | C5B  | C10B             | 175.7(5)  |
| C4B | C5B  | C10B | N1B              | -0.2(9)    | C12C | C4C  | C5C  | C6C              | 7.9(9)    |
| C4C | C5C  | C6C  | C7C              | -178.2(6)  | C12C | C4C  | C5C  | C10C             | -173.3(5) |
| C4C | C5C  | C10C | C9C              | 179.9(5)   | N1A  | C2A  | C3A  | C4A              | -0.7(9)   |
| C4C | C5C  | C10C | N1C              | 2.2(8)     | N1A  | C2A  | C11A | O1A              | 6.7(8)    |
| C4C | C12C | O3C  | Tb2 <sup>2</sup> | 155.4(5)   | N1A  | C2A  | C11A | O2A              | -176.0(6) |
| C4C | C12C | O4C  | Tb2 <sup>4</sup> | 82(2)      | N1B  | C2B  | C3B  | C4B              | 0.2(9)    |
| C5A | C4A  | C12A | O3A              | 152.4(5)   | N1B  | C2B  | C11B | O1B              | 8.9(8)    |
| C5A | C4A  | C12A | O4A              | -29.0(8)   | N1B  | C2B  | C11B | O2B              | -170.5(6) |
| C5A | C6A  | C7A  | C8A              | -1.1(10)   | N1C  | C2C  | C3C  | C4C              | 2.8(9)    |
| C5A | C10A | N1A  | C2A              | 0.9(8)     | N1C  | C2C  | C11C | O1C              | -18.3(8)  |
| C5A | C10A | N1A  | Tb1              | -165.9(4)  | N1C  | C2C  | C11C | O2C              | 162.3(6)  |
| C5B | C4B  | C12B | O3B              | 121.5(7)   | O1B  | C11B | O2B  | Tb2              | -25.6(9)  |
| C5B | C4B  | C12B | O4B              | -59.5(7)   | O2A  | C11A | O1A  | Tb1              | -174.6(5) |
| C5B | C6B  | C7B  | C8B              | -1.2(11)   | O2B  | C11B | O1B  | Tb1 <sup>1</sup> | 176.8(4)  |
| C5B | C10B | N1B  | C2B              | 3.7(8)     | O2C  | C11C | O1C  | Tb2              | -162.8(5) |
| C5B | C10B | N1B  | Tb1 <sup>1</sup> | -168.1(4)  | O3A  | C12A | O4A  | Tb1 <sup>3</sup> | 75.7(12)  |
| C5C | C4C  | C12C | O3C              | -145.7(6)  | O3C  | C12C | O4C  | Tb2 <sup>4</sup> | -95(2)    |
| C5C | C4C  | C12C | O4C              | 37.3(8)    | O4A  | C12A | O3A  | Tb1 <sup>2</sup> | 30.1(10)  |
| C5C | C6C  | C7C  | C8C              | -2.4(10)   | O4C  | C12C | O3C  | Tb2 <sup>2</sup> | -27.9(11) |
| C5C | C10C | N1C  | C2C              | -4.8(8)    |      |      |      |                  |           |

Symmetry codes: <sup>1</sup>2-x,1-y,1-z; <sup>2</sup>-1+x,y,z; <sup>3</sup>1-x,-y,1-z; <sup>4</sup>1-x,1-y,2-z.

**Table S16.** Torsion Angles for (13) [Er<sub>2</sub>(Qdca)<sub>3</sub>(H<sub>2</sub>O)<sub>4</sub>]-4H<sub>2</sub>O.

| A   | B    | C    | D                | Angle/°   | A   | B    | C    | D    | Angle/°   |
|-----|------|------|------------------|-----------|-----|------|------|------|-----------|
| C2A | C3A  | C4A  | C5A              | -0.9(6)   | C5C | C10C | N1C  | C2C  | 1.4(5)    |
| C2A | C3A  | C4A  | C12A             | 177.5(3)  | C6A | C5A  | C10A | C9A  | -2.9(6)   |
| C2A | C11A | O1A  | Er1              | -9.1(6)   | C6A | C5A  | C10A | N1A  | 178.0(4)  |
| C2B | C3B  | C4B  | C5B              | -4.0(5)   | C6A | C7A  | C8A  | C9A  | -3.6(9)   |
| C2B | C3B  | C4B  | C12B             | 175.2(3)  | C6B | C5B  | C10B | C9B  | 2.7(6)    |
| C2B | C11B | O1B  | Er1 <sup>1</sup> | -2.3(5)   | C6B | C5B  | C10B | N1B  | -177.9(4) |
| C2B | C11B | O2B  | Er2              | -156.0(2) | C6B | C7B  | C8B  | C9B  | 1.7(8)    |
| C2C | C3C  | C4C  | C5C              | 1.2(6)    | C6C | C5C  | C10C | C9C  | 1.7(6)    |
| C2C | C3C  | C4C  | C12C             | -176.7(3) | C6C | C5C  | C10C | N1C  | 179.9(4)  |
| C2C | C11C | O1C  | Er2              | -4.4(5)   | C6C | C7C  | C8C  | C9C  | 2.3(8)    |
| C3A | C2A  | C11A | O1A              | 170.7(4)  | C7A | C8A  | C9A  | C10A | 2.5(8)    |
| C3A | C2A  | C11A | O2A              | -7.7(6)   | C7B | C8B  | C9B  | C10B | -1.1(7)   |
| C3A | C2A  | N1A  | C10A             | 2.0(5)    | C7C | C8C  | C9C  | C10C | -2.7(7)   |
| C3A | C4A  | C5A  | C6A              | -177.0(4) | C8A | C9A  | C10A | C5A  | 0.7(7)    |
| C3A | C4A  | C5A  | C10A             | 1.8(5)    | C8A | C9A  | C10A | N1A  | 179.8(4)  |
| C3A | C4A  | C12A | O3A              | 44.8(5)   | C8B | C9B  | C10B | C5B  | -1.1(6)   |
| C3A | C4A  | C12A | O4A              | -134.2(4) | C8B | C9B  | C10B | N1B  | 179.5(4)  |
| C3B | C2B  | C11B | O1B              | 169.3(3)  | C8C | C9C  | C10C | C5C  | 0.7(6)    |
| C3B | C2B  | C11B | O2B              | -11.5(5)  | C8C | C9C  | C10C | N1C  | -177.6(4) |

|     |      |      |                  |           |      |      |      |                  |           |
|-----|------|------|------------------|-----------|------|------|------|------------------|-----------|
| C3B | C2B  | N1B  | Er1 <sup>1</sup> | -164.6(3) | C9A  | C10A | N1A  | C2A              | 179.9(4)  |
| C3B | C2B  | N1B  | C10B             | 1.7(5)    | C9B  | C10B | N1B  | Er1 <sup>1</sup> | -20.5(5)  |
| C3B | C4B  | C5B  | C6B              | -178.1(4) | C9B  | C10B | N1B  | C2B              | 175.6(4)  |
| C3B | C4B  | C5B  | C10B             | 1.9(5)    | C9C  | C10C | N1C  | Er2              | 4.1(5)    |
| C3B | C4B  | C12B | O3B              | 68.6(5)   | C9C  | C10C | N1C  | C2C              | 179.6(3)  |
| C3B | C4B  | C12B | O4B              | -110.8(4) | C10A | C5A  | C6A  | C7A              | 1.9(6)    |
| C3C | C2C  | C11C | O1C              | -171.8(4) | C10B | C5B  | C6B  | C7B              | -2.2(6)   |
| C3C | C2C  | C11C | O2C              | 8.2(6)    | C10C | C5C  | C6C  | C7C              | -2.1(6)   |
| C3C | C2C  | N1C  | Er2              | 172.5(3)  | C11A | C2A  | C3A  | C4A              | -179.4(3) |
| C3C | C2C  | N1C  | C10C             | -3.7(5)   | C11A | C2A  | N1A  | C10A             | -179.7(3) |
| C3C | C4C  | C5C  | C6C              | 179.0(4)  | C11B | C2B  | C3B  | C4B              | -177.1(3) |
| C3C | C4C  | C5C  | C10C             | -3.3(5)   | C11B | C2B  | N1B  | Er1 <sup>1</sup> | 14.8(4)   |
| C3C | C4C  | C12C | O3C              | 79.4(5)   | C11B | C2B  | N1B  | C10B             | -178.9(3) |
| C3C | C4C  | C12C | O4C              | -97.3(5)  | C11C | C2C  | C3C  | C4C              | -178.0(4) |
| C4A | C5A  | C6A  | C7A              | -179.3(4) | C11C | C2C  | N1C  | Er2              | -7.1(4)   |
| C4A | C5A  | C10A | C9A              | 178.2(4)  | C11C | C2C  | N1C  | C10C             | 176.7(3)  |
| C4A | C5A  | C10A | N1A              | -0.9(5)   | C12A | C4A  | C5A  | C6A              | 4.7(6)    |
| C4A | C12A | O3A  | Er1 <sup>2</sup> | 155.8(3)  | C12A | C4A  | C5A  | C10A             | -176.5(3) |
| C4A | C12A | O4A  | Er1 <sup>3</sup> | 112.8(13) | C12B | C4B  | C5B  | C6B              | 2.7(6)    |
| C4B | C5B  | C6B  | C7B              | 177.8(4)  | C12B | C4B  | C5B  | C10B             | -177.3(3) |
| C4B | C5B  | C10B | C9B              | -177.3(4) | C12C | C4C  | C5C  | C6C              | -3.2(6)   |
| C4B | C5B  | C10B | N1B              | 2.1(6)    | C12C | C4C  | C5C  | C10C             | 174.6(3)  |
| C4B | C12B | O4B  | Er1              | -100.1(8) | N1A  | C2A  | C3A  | C4A              | -1.1(6)   |
| C4C | C5C  | C6C  | C7C              | 175.7(4)  | N1A  | C2A  | C11A | O1A              | -7.8(5)   |
| C4C | C5C  | C10C | C9C              | -176.1(4) | N1A  | C2A  | C11A | O2A              | 173.9(4)  |
| C4C | C5C  | C10C | N1C              | 2.1(5)    | N1B  | C2B  | C3B  | C4B              | 2.3(6)    |
| C4C | C12C | O3C  | Er2 <sup>4</sup> | 88.6(4)   | N1B  | C2B  | C11B | O1B              | -10.1(5)  |
| C4C | C12C | O4C  | Er2 <sup>2</sup> | 162.9(3)  | N1B  | C2B  | C11B | O2B              | 169.1(3)  |
| C5A | C4A  | C12A | O3A              | -136.9(4) | N1C  | C2C  | C3C  | C4C              | 2.5(6)    |
| C5A | C4A  | C12A | O4A              | 44.1(5)   | N1C  | C2C  | C11C | O1C              | 7.8(5)    |
| C5A | C6A  | C7A  | C8A              | 1.3(8)    | N1C  | C2C  | C11C | O2C              | -172.2(4) |
| C5A | C10A | N1A  | C2A              | -1.0(5)   | O1B  | C11B | O2B  | Er2              | 23.1(5)   |
| C5B | C4B  | C12B | O3B              | -112.2(5) | O2A  | C11A | O1A  | Er1              | 169.2(3)  |
| C5B | C4B  | C12B | O4B              | 68.4(5)   | O2B  | C11B | O1B  | Er1 <sup>1</sup> | 178.6(3)  |
| C5B | C6B  | C7B  | C8B              | 0.0(7)    | O2C  | C11C | O1C  | Er2              | 175.7(3)  |
| C5B | C10B | N1B  | Er1 <sup>1</sup> | 160.1(3)  | O3A  | C12A | O4A  | Er1 <sup>3</sup> | -66.1(15) |
| C5B | C10B | N1B  | C2B              | -3.9(5)   | O3B  | C12B | O4B  | Er1              | 80.5(9)   |
| C5C | C4C  | C12C | O3C              | -98.4(4)  | O3C  | C12C | O4C  | Er2 <sup>2</sup> | -13.5(7)  |
| C5C | C4C  | C12C | O4C              | 84.8(5)   | O4A  | C12A | O3A  | Er1 <sup>2</sup> | -25.3(7)  |
| C5C | C6C  | C7C  | C8C              | 0.1(7)    | O4C  | C12C | O3C  | Er2 <sup>4</sup> | -94.9(5)  |
| C5C | C10C | N1C  | Er2              | -174.1(3) |      |      |      |                  |           |

Symmetry codes: <sup>1</sup>1-x,1-y,1-z; <sup>2</sup>1+x,y,z; <sup>3</sup>1-x,-y,1-z; <sup>4</sup>1-x,1-y,2-z.

**Table S17.** Hydrogen bonds of the (1) [Nd<sub>2</sub>(Qdca)<sub>3</sub>(H<sub>2</sub>O)<sub>3</sub>].

| D-H...A                     | d(D-H) / Å | d(H...A) / Å | d(D...A) / Å | <DHA / ° |
|-----------------------------|------------|--------------|--------------|----------|
| O1W-H1WB...O2C <sup>1</sup> | 0.84       | 1.85         | 2.666        | 163.93   |
| O2W-H2WA...O4C              | 0.84       | 1.96         | 2.778        | 163.93   |
| O2W-H2WB...N1B <sup>2</sup> | 0.84       | 1.92         | 2.746        | 168.50   |
| O3W-H3WA...O1A <sup>2</sup> | 0.84       | 2.60         | 3.364        | 152.90   |
| O3W-H3WB...N1B <sup>3</sup> | 0.84       | 2.50         | 3.053        | 123.92   |
| O1W-H1WA...O1A              | 0.84       | 2.37         | 3.032        | 135.84   |
| O1W-H1WA...O3A <sup>4</sup> | 0.84       | 2.37         | 2.800        | 112.85   |

Symmetry codes: <sup>1</sup>1-x,1-y,1-z; <sup>2</sup>1+x,1-y,1-z; <sup>3</sup>1+x,1-y,1-z; <sup>4</sup>1-x,1-y,1-z.

**Table S18.** Hydrogen bonds of the **(4)** [Nd<sub>2</sub>(Qdca)<sub>3</sub>(H<sub>2</sub>O)<sub>4</sub>].3H<sub>2</sub>O.

| D-H...A                      | d(D-H) /Å | d(H...A) /Å | d(D...A) /Å | <DHA/° |
|------------------------------|-----------|-------------|-------------|--------|
| O3W-H3WA... O3A <sup>1</sup> | 0.84      | 1.85        | 2.670       | 164.86 |
| O2W-H2WA... O2C <sup>2</sup> | 0.84      | 2.06        | 2.815       | 149.73 |
| O2W-H2WB... O6W              | 0.84      | 2.26        | 2.949       | 139.76 |
| O1W-H1WA... O7W              | 0.84      | 1.95        | 2.699       | 148.15 |
| O4W-H4WA... O2C <sup>2</sup> | 0.84      | 2.02        | 2.778       | 149.21 |
| O5W-H5WA... O3A <sup>3</sup> | 0.84      | 1.92        | 2.695       | 153.77 |
| O5W-H5WB... O6W <sup>4</sup> | 0.84      | 2.19        | 2.852       | 135.27 |
| O7W-H7WA... O5W              | 0.84      | 1.92        | 2.709       | 156.50 |
| O7W-H7WB... O1C <sup>5</sup> | 0.84      | 2.02        | 2.779       | 150.25 |
| O6W-H6WA... O1B <sup>6</sup> | 0.84      | 1.91        | 2.733       | 166.27 |
| O6W-H6WB... O3C <sup>2</sup> | 0.84      | 2.10        | 2.867       | 151.44 |

Symmetry codes: <sup>1</sup> x-1, y-1, z; <sup>2</sup> x+1, y, z; <sup>3</sup> -x+1, -y+2, -z; <sup>4</sup> -x+1, -y+1, -z; <sup>5</sup> -x, -y+2, -z; <sup>6</sup> -x+1, -y+1, -z+1.

**Table S19.** Hydrogen bonds of the **(8)** [Eu<sub>2</sub>(Qdca)<sub>3</sub>(H<sub>2</sub>O)<sub>4</sub>].H<sub>2</sub>O.

| D-H...A                      | d(D-H) /Å | d(H...A) /Å | d(D...A) /Å | <DHA/° |
|------------------------------|-----------|-------------|-------------|--------|
| O2W-H2WA... O1B              | 0.84      | 2.10        | 2.799       | 139.98 |
| O2W-H2WB... O2A <sup>1</sup> | 0.84      | 1.87        | 2.698       | 166.67 |
| O3W-H3WA... O3B <sup>2</sup> | 0.84      | 1.98        | 2.756       | 153.43 |
| O4W-H4WA... O5W <sup>3</sup> | 0.84      | 2.01        | 2.757       | 147.26 |
| O4W-H4WB... O3B <sup>4</sup> | 0.84      | 2.18        | 2.989       | 160.94 |
| O5W-H5WA... O1C <sup>5</sup> | 0.84      | 2.81        | 3.407       | 129.21 |
| O5W-H5WA... O2C <sup>5</sup> | 0.84      | 1.91        | 2.741       | 169.08 |
| O5W-H5WB... O1A <sup>3</sup> | 0.84      | 2.27        | 2.936       | 136.20 |
| O5W-H5WB... O2A <sup>3</sup> | 0.84      | 2.70        | 3.490       | 156.66 |

Symmetry codes: <sup>1</sup> -x+1, -y+1, -z+1; <sup>2</sup> -x+2, -y+1, -z+2; <sup>3</sup> -x+2, -y+1, -z+1; <sup>4</sup> -x+2, -y, -z+1; <sup>5</sup> -x+2, -y+2, -z+2.

**Table S20.** Hydrogen bonds of the **(9)** [Tb<sub>2</sub>(Qdca)<sub>3</sub>(H<sub>2</sub>O)<sub>4</sub>].H<sub>2</sub>O.

| D-H...A                      | d(D-H) /Å | d(H...A) /Å | d(D...A) /Å | <DHA/° |
|------------------------------|-----------|-------------|-------------|--------|
| O1W-H1WA... O1B              | 0.84      | 2.09        | 2.800       | 142.55 |
| O1W-H1WB... O2A <sup>1</sup> | 0.84      | 1.90        | 2.711       | 163.27 |
| O2W-H2WB... O3B <sup>2</sup> | 0.84      | 1.93        | 2.758       | 169.96 |
| O3W-H3WA... O5W <sup>3</sup> | 0.84      | 1.92        | 2.710       | 156.72 |
| O4W-H4WA... O3B <sup>4</sup> | 0.84      | 2.21        | 3.013       | 159.21 |
| O4W-H4WB... O5W <sup>5</sup> | 0.84      | 1.94        | 2.761       | 167.17 |
| O5W-H5WA... O1A <sup>6</sup> | 0.84      | 2.51        | 2.942       | 113.38 |
| O5W-H5WB... O2C              | 0.84      | 1.89        | 2.726       | 175.54 |

Symmetry codes: <sup>1</sup> -x+1, -y+1, -z+1; <sup>2</sup> -x+2, -y+1, -z+2; <sup>3</sup> -x+2, -y+2, -z+2; <sup>4</sup> -x+2, -y, -z+1; <sup>5</sup> x, y-1, z-1, -z+1; <sup>6</sup> x, y+1, z+1.

**Table S21.** Hydrogen bonds of the **(13)** [Er<sub>2</sub>(Qdca)<sub>3</sub>(H<sub>2</sub>O)<sub>4</sub>].4H<sub>2</sub>O.

| D-H...A                      | d(D-H) /Å | d(H...A) /Å | d(D...A) /Å | <DHA/° |
|------------------------------|-----------|-------------|-------------|--------|
| O1W-H1WA... O3B <sup>1</sup> | 0.84      | 2.08        | 2.904       | 165.59 |
| O1W-H1WB... O6W <sup>2</sup> | 0.84      | 1.96        | 2.741       | 154.95 |
| O2W-H2WA... O3C <sup>3</sup> | 0.84      | 1.98        | 2.761       | 154.28 |
| O2W-H2WB... O5W              | 0.84      | 1.94        | 2.681       | 147.00 |
| O3W-H3WA... O1B              | 0.84      | 2.27        | 2.895       | 131.92 |
| O3W-H3WB... O2A <sup>4</sup> | 0.84      | 1.87        | 2.708       | 171.34 |
| O4W-H4WA... O6W              | 0.84      | 1.84        | 2.673       | 171.96 |
| O4W-H4WB... O8W              | 0.84      | 1.96        | 2.656       | 140.33 |
| O5W-H5WB... O3B <sup>5</sup> | 0.84      | 1.89        | 2.700       | 160.76 |

|                             |      |      |       |        |
|-----------------------------|------|------|-------|--------|
| O6W-H6WA...O7W              | 0.84 | 1.88 | 2.688 | 160.16 |
| O6W-H6WB...O1A <sup>2</sup> | 0.84 | 2.34 | 2.810 | 116.04 |
| O6W-H6WB...O2A <sup>2</sup> | 0.84 | 2.54 | 3.261 | 145.06 |
| O7W-H7WA...O2C <sup>3</sup> | 0.84 | 1.95 | 2.728 | 152.70 |
| O7W-H7WB...O2C <sup>6</sup> | 0.84 | 1.96 | 2.793 | 175.13 |
| O8W-H8WB...O7W <sup>6</sup> | 0.84 | 1.95 | 2.779 | 169.31 |
| O8W-H8WA...O5W <sup>6</sup> | 0.84 | 2.16 | 2.788 | 131.06 |

Symmetry codes: <sup>1</sup>-x, -y, -z+1; <sup>2</sup>-x, -y+1, -z+1; <sup>3</sup>x-1, y, z; <sup>4</sup>-x+1, -y+1, -z+1; <sup>5</sup>-x, -y+1, -z+2; <sup>6</sup>-x, -y+2, -z+2.

**Table S22.** Conformation of the COO<sup>-</sup> groups of the quionoline-2,4-dicarboxylate ligand.

| (1) [Nd <sub>2</sub> (Qdca) <sub>3</sub> (H <sub>2</sub> O) <sub>3</sub> ]                    |                  |           |                  |           |                  |           |
|-----------------------------------------------------------------------------------------------|------------------|-----------|------------------|-----------|------------------|-----------|
| Position of COO <sup>-</sup>                                                                  | A-Qdca           |           | B-Qdca           |           | C-Qdca           |           |
| 2                                                                                             | C3A-C2A-C11A-O1A | 166.8(8)  | C3B-C2B-C11B-O1B | 174.3(6)  | C3C-C2C-C11C-O1C | -173.5(6) |
|                                                                                               | C3A-C2A-C11A-O2A | -12.1(13) | C3B-C2B-C11B-O2B | -5.4(9)   | C3C-C2C-C11C-O2C | 7.0(10)   |
| 4                                                                                             | C3A-C4A-C12A-O3A | 88.4(10)  | C3B-C4B-C12B-O3B | -61.5(8)  | C3C-C4C-C12C-O3C | -152.6(8) |
|                                                                                               | C3A-C4A-C12A-O4A | -93.1(10) | C3B-C4B-C12B-O4B | 120.1(7)  | C3C-C4C-C12C-O4C | 24.4(10)  |
| (4) [Nd <sub>2</sub> (Qdca) <sub>3</sub> (H <sub>2</sub> O) <sub>4</sub> ·3H <sub>2</sub> O]  |                  |           |                  |           |                  |           |
| Position of COO <sup>-</sup>                                                                  | A-Qdca           |           | B-Qdca           |           | C-Qdca           |           |
| 2                                                                                             | C3A-C2A-C11A-O1A | -154.2(6) | C3B-C2B-C11B-O1B | 171.2(6)  | C3C-C2C-C11C-O1C | 151.4(7)  |
|                                                                                               | C3A-C2A-C11A-O2A | 25.6(9)   | C3B-C2B-C11B-O2B | -7.0(10)  | C3C-C2C-C11C-O2C | -28.7(10) |
| 4                                                                                             | C3A-C4A-C12A-O3A | -32.0(10) | C3B-C4B-C12B-O3B | 118.2(7)  | C3C-C4C-C12C-O3C | 56.6(11)  |
|                                                                                               | C3A-C4A-C12A-O4A | 142.7(7)  | C3B-C4B-C12B-O4B | 61.2(9)   | C3C-C4C-C12C-O4C | -123.6(8) |
| (8) Eu <sub>2</sub> (Qdca) <sub>3</sub> (H <sub>2</sub> O) <sub>4</sub> ·H <sub>2</sub> O     |                  |           |                  |           |                  |           |
| Position of COO <sup>-</sup>                                                                  | A-Qdca           |           | B-Qdca           |           | C-Qdca           |           |
| 2                                                                                             | C3A-C2A-C11A-O1A | -172.0(5) | C3B-C2B-C11B-O1B | -171.0(5) | C3C-C2C-C11C-O1C | 162.1(5)  |
|                                                                                               | C3A-C2A-C11A-O2A | 5.5(9)    | C3B-C2B-C11B-O2B | 10.2(8)   | C3C-C2C-C11C-O2C | -17.2(8)  |
| 4                                                                                             | C3A-C4A-C12A-O3A | -32.1(7)  | C3B-C4B-C12B-O3B | -58.7(8)  | C3C-C4C-C12C-O3C | 37.7(8)   |
|                                                                                               | C3A-C4A-C12A-O4A | 145.6(5)  | C3B-C4B-C12B-O4B | 120.7(6)  | C3C-C4C-C12C-O4C | -139.2(6) |
| (13) [Er <sub>2</sub> (Qdca) <sub>3</sub> (H <sub>2</sub> O) <sub>4</sub> ·4H <sub>2</sub> O] |                  |           |                  |           |                  |           |
| Position of COO <sup>-</sup>                                                                  | A-Qdca           |           | B-Qdca           |           | C-Qdca           |           |
| 2                                                                                             | C3A-C2A-C11A-O1A | 170.7(4)  | C3B-C2B-C11B-O1B | 169.3(3)  | C3C-C2C-C11C-O1C | -171.8(4) |
|                                                                                               | C3A-C2A-C11A-O2A | -7.7(6)   | C3B-C2B-C11B-O2B | -11.5(5)  | C3C-C2C-C11C-O2C | 8.2(6)    |
| 4                                                                                             | C3A-C4A-C12A-O3A | 44.8(5)   | C3B-C4B-C12B-O3B | 68.6(5)   | C3C-C4C-C12C-O3C | 79.4(5)   |
|                                                                                               | C3A-C4A-C12A-O4A | -134.2(4) | C3B-C4B-C12B-O4B | -110.8(4) | C3C-C4C-C12C-O4C | -97.3(5)  |

**Table S23.** Dihedral angles between best planes of carboxylic groups and quinolone ring.

| (1) [Nd <sub>2</sub> (Qdca) <sub>3</sub> (H <sub>2</sub> O) <sub>3</sub> ]                   |                                    |        |                                    |        |                                    |        |
|----------------------------------------------------------------------------------------------|------------------------------------|--------|------------------------------------|--------|------------------------------------|--------|
| Position of<br>COO <sup>-</sup>                                                              | A-Qdca                             |        | B-Qdca                             |        | C-Qdca                             |        |
| 2                                                                                            | atoms: C4A C3A C2A N1A<br>C10A C5A | 12.90° | atoms: C3B C4B C5B C10B<br>N1B C2B | 6.11°  | atoms: C2C C3C C4C C5C<br>C10C N1C | 6.96°  |
|                                                                                              | atoms: O1A C11A O2A                |        | atoms: O2B C11B O1B                |        | atoms: O1C C11C O2C                |        |
| 4                                                                                            | atoms: C4A C3A C2A N1A<br>C10A C5A | 88.37° | atoms: C3B C4B C5B C10B<br>N1B C2B | 62.61° | atoms: C2C C3C C4C C5C<br>C10C N1C | 24.96° |
|                                                                                              | atoms: O4A C12A O3A                |        | atoms: O3B C12B O4B                |        | atoms: O4C C12C O3C                |        |
| (4) [Nd <sub>2</sub> (Qdca) <sub>3</sub> (H <sub>2</sub> O) <sub>4</sub> ]·3H <sub>2</sub> O |                                    |        |                                    |        |                                    |        |
|                                                                                              | A-Qdca                             |        | B-Qdca                             |        | C-Qdca                             |        |
| 2                                                                                            | atoms: C2A N1A C10A C5A<br>C4A C3A | 25.40° | atoms: C10B N1B C2B C3B<br>C4B C5B | 8.82°  | atoms: C10C N1C C2C C3C<br>C4C C5C | 28.88° |
|                                                                                              | atoms: O1A C11A O2A                |        | atoms: O2B C11B O1B                |        | atoms: O2C C11C O1C                |        |
| 4                                                                                            | atoms: C2A N1A C10A C5A<br>C4A C3A | 35.88° | atoms: C10B N1B C2B C3B<br>C4B C5B | 61.65° | atoms: C10C N1C C2C C3C<br>C4C C5C | 51.93° |
|                                                                                              | atoms: O4A C12A O3A                |        | atoms: O3B                         |        | atoms: O4C C12C O3C                |        |
| (8) Eu <sub>2</sub> (Qdca) <sub>3</sub> (H <sub>2</sub> O) <sub>4</sub> ]·H <sub>2</sub> O   |                                    |        |                                    |        |                                    |        |
|                                                                                              | A-Odca                             |        | B-Odca                             |        | C-Odca                             |        |

|                                                                                               |                                    |        |                                    |        |                                    |        |
|-----------------------------------------------------------------------------------------------|------------------------------------|--------|------------------------------------|--------|------------------------------------|--------|
| 2                                                                                             | atoms: C2A C3A C4A C5A<br>C10A N1A | 6.70°  | atoms:C4B C5B C10B N1B<br>C2B C3B  | 10.64° | atoms:C4C C5C C10C N1C<br>C2C C3C  | 18.58° |
|                                                                                               | atoms:O2A C11A O1A                 |        | atoms: O2B C11B O1B                |        | atoms:O1C C11C O2C                 |        |
| 4                                                                                             | atoms: C2A C3A C4A C5A<br>C10A N1A | 32.20° | atoms: C4B C5B C10B N1B<br>C2B C3B | 58.63° | atoms: C4C C5C C10C N1C<br>C2C C3C | 39.50° |
|                                                                                               | atoms: O3A C12A O4A                |        | atoms:O4B C12B O3B                 |        | atoms:O4C C12C O3C                 |        |
| (13) [Er <sub>2</sub> (Qdca) <sub>3</sub> (H <sub>2</sub> O) <sub>4</sub> ]·4H <sub>2</sub> O |                                    |        |                                    |        |                                    |        |
| A-Qdca                                                                                        |                                    |        | B-Qdca                             |        | C-Qdca                             |        |
| 2                                                                                             | atoms:N1A C2A C3A C4A<br>C5A C10A  | 8.20°  | atoms:C4B C5B C10B N1B<br>C2B C3B  | 11.70° | atoms:N1C C10C C5C C4C<br>C3C C2C  | 8.74°  |
|                                                                                               | atoms:O2A C11A O1A                 |        | atoms:O1B C11B O2B                 |        | atoms:O1C C11C O2C                 |        |
| 4                                                                                             | atoms:N1A C2A C3A C4A<br>C5A C10A  | 44.51° | atoms:C4B C5B C10B N1B<br>C2B C3B  | 69.12° | atoms:N1C C10C C5C C4C<br>C3C C2C  | 82.27° |
|                                                                                               | atoms:O3A C12A O4A                 |        | atoms:O4B C12B O3B                 |        | atoms:O3C C12C O4C                 |        |

Table S24. Data of thermogravimetric analysis.

| Neodymium complexes | ΔT <sub>1</sub> (°C) | Mass loss (%) | ΔT <sub>2</sub> (°C) | Mass loss (%) | ΔT <sub>3</sub> (°C) | Mass loss (%) | ΔT <sub>4</sub> (°C) | Mass loss (%) | ΔT <sub>5</sub> (°C) | Mass loss (%) |
|---------------------|----------------------|---------------|----------------------|---------------|----------------------|---------------|----------------------|---------------|----------------------|---------------|
| 100°C               | 30-135               | 2.38          | 135-357              | 7.49          | 357-527              | 50.53         | 527-592              | 4.19          | 592-697              | 2.69          |
| 120°C               | 30-122               | 3.91          | 122-345              | 8.33          | 345-522              | 48.81         | 522-587              | 4.40          | 587-680              | 3.12          |
| 150°C               | 30-304               | 10.54         | -                    | -             | 304-487              | 42.75         | 487-591              | 11.23         | 591-675              | 3.83          |
| Europium complexes  | ΔT <sub>1</sub> (°C) | Mass loss (%) | ΔT <sub>2</sub> (°C) | Mass loss (%) | ΔT <sub>3</sub> (°C) | Mass loss (%) | ΔT <sub>4</sub> (°C) | Mass loss (%) | ΔT <sub>5</sub> (°C) | Mass loss (%) |
| 100°C               | 30-121<br>121-165*   | 4.67<br>2.17* | 165-326              | 6.02          | 326-443              | 30.69         | 443-516              | 49.25         | 516-628              | 5.81          |
| 120°C               | 30-143               | 3.86          | 143-294              | 6.85          | 294-430              | 25.83         | 430-516              | 23.86         | 516-667              | 5.81          |
| 150°C               | 30-153               | 7.07          | 153-285              | 4.28          | 285-443              | 37.42         | 443-534              | 14.52         | 534-638              | 3.98          |
| Terbium complexes   | ΔT <sub>1</sub> (°C) | Mass loss (%) | ΔT <sub>2</sub> (°C) | Mass loss (%) | ΔT <sub>3</sub> (°C) | Mass loss (%) | ΔT <sub>4</sub> (°C) | Mass loss (%) | ΔT <sub>5</sub> (°C) | Mass loss (%) |
| 100°C               | 30-122               | 3.63          | 122-325              | 8.06          | 325-704              | 53.08         | -                    | -             | -                    | -             |
| 120°C               | 30-132               | 4.43          | 132-314              | 6.97          | 314-689              | 53.73         | -                    | -             | -                    | -             |
| 150°C               | 30-323               | 10.47         | 323-712              | 52.00         | -                    | -             | -                    | -             | -                    | -             |
| Erbium complexes    | ΔT <sub>1</sub> (°C) | Mass loss (%) | ΔT <sub>2</sub> (°C) | Mass loss (%) | ΔT <sub>3</sub> (°C) | Mass loss (%) | ΔT <sub>4</sub> (°C) | Mass loss (%) | ΔT <sub>5</sub> (°C) | Mass loss (%) |
| 100°C               | 30-114               | 4.76          | 114-190*<br>190-330  | 3.58*<br>5.09 | 330-570              | 50.57         | -                    | -             | 570-720              | 2.00          |
| 120°C               | 30-144               | 9.69          | 144-192*<br>192-303  | 2.25*<br>2.72 | 303-544              | 48.32         | -                    | -             | 544-723              | 2.90          |
| 150°C               | 30-326*              | 9.52          | -                    | -             | 326-573              | 46.10         | -                    | -             | 573-741              | 3.85          |

Table S25. The main crystallographic data for [Gd<sub>2</sub>(Qdca)<sub>3</sub>(H<sub>2</sub>O)<sub>4</sub>]·H<sub>2</sub>O.

| Compound               | [Gd <sub>2</sub> (Qdca) <sub>3</sub> (H <sub>2</sub> O) <sub>4</sub> ]·H <sub>2</sub> O |
|------------------------|-----------------------------------------------------------------------------------------|
| Empirical formula      | C <sub>33</sub> H <sub>25</sub> N <sub>3</sub> O <sub>17</sub> Gd <sub>2</sub>          |
| Formula weight         | 1049.5                                                                                  |
| T /K                   | 295(2)                                                                                  |
| Crystal system         | Triclinic                                                                               |
| Space group            | P-1                                                                                     |
| a /Å                   | 9.8314(1)                                                                               |
| b /Å                   | 12.3257(2)                                                                              |
| c /Å                   | 14.1759(1)                                                                              |
| α /°                   | 89.643(9)                                                                               |
| β /°                   | 82.577(1)                                                                               |
| γ /°                   | 86.612(1)                                                                               |
| Volume /Å <sup>3</sup> | 1700.44(1)                                                                              |
